# Supplementary material for: Total synthesis of panicein A2
Source: publisher site journal article supplement (doi:10.3762/bjoc.11.215), 2015-10-26
Supplement: Additional file 1 [file 1860-5397-11-215-S1.pdf]

# Supporting Information File 1

for

## Total synthesis of panicein A<sub>2</sub>

Lili Yeung, Lisa I. Pilkington, Melissa M. Cadelis, Brent R. Copp and David Barker\*

Address: School of Chemical Sciences, University of Auckland, 23 Symonds Street,  
Auckland, New Zealand

Email: David Barker - d.barker@auckland.ac.nz

\* Corresponding author

### **Experimental procedures, characterisation data of new compounds, NMR comparison tables of natural and synthetic 5 and NCI testing results sheet**

#### **Contents**

|                                                                                                                                                                          |     |
|--------------------------------------------------------------------------------------------------------------------------------------------------------------------------|-----|
| General experimental details                                                                                                                                             | S2  |
| Experimental procedures and compound data                                                                                                                                | S2  |
| Comparison of the NMR data obtained from the isolation of panicein A <sub>2</sub> ( <b>5</b> ) and the<br>NMR data of the synthetic panicein A <sub>2</sub> ( <b>5</b> ) | S16 |
| NCI results data sheet                                                                                                                                                   | S18 |
| References                                                                                                                                                               | S19 |

## General experimental details:

All reactions were carried out under a nitrogen atmosphere in dry, freshly distilled solvents unless otherwise noted. NMR spectra were recorded on a 400 MHz or 500 MHz spectrometer. Chemical shifts are reported relative to the solvent peak of  $\text{CDCl}_3$  ( $\delta$  7.26 for  $^1\text{H}$  and  $\delta$  77.0 for  $^{13}\text{C}$ ) or  $\text{CD}_3\text{OD}$  ( $\delta$  3.31 for  $^1\text{H}$  and  $\delta$  49.0 for  $^{13}\text{C}$ ).  $^1\text{H}$  NMR data is reported as position ( $\delta$ ), relative integral, multiplicity (s, singlet; d, doublet; dd, doublet of doublets; ddq doublet of doublet of quartets; m, multiplet; pd, pentet of doublets, br, broad), coupling constant ( $J$ , Hz), and the assignment of the atom.  $^{13}\text{C}$  NMR data are reported as position ( $\delta$ ) and assignment of the atom. NMR assignments were performed using HSQC and HMBC experiments. High-resolution mass spectrometry (HRMS) was carried out by either chemical ionization (CI) or electrospray ionization (ESI) on a MicroTOF-Q mass spectrometer. Unless noted, chemical reagents were used as purchased.

## Experimental procedures and compound data:

### 2,3,5-Trimethylanisole

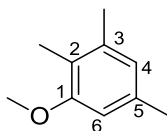

2,3,5-Trimethylphenol **11** (1.52 g, 11.0 mmol) was added to EtOH (30 mL) and  $\text{H}_2\text{O}$  (1.5 mL). KOH (0.73 g, 13.0 mmol) was then added to the mixture and stirred in an ice bath until the solution went clear. Methyl iodide (0.82 mL, 13.2 mmol) was added dropwise to the solution. The solution was stirred for 2 h at rt and then for 12 h at 60 °C.  $\text{H}_2\text{O}$  (50 mL) was added to the reaction mixture and the solution then extracted with  $\text{Et}_2\text{O}$  (1  $\times$  50 mL). The organic extract was washed first with 5% NaOH (20 mL), then  $\text{H}_2\text{O}$  (2  $\times$  20 mL), dried ( $\text{MgSO}_4$ ) and the solvent removed in vacuo. The product was purified using silica gel column chromatography in  $\text{CH}_2\text{Cl}_2$ , giving the title compound as a pale yellow oil (1.02 g, 62%).

$R_f$  ( $\text{CH}_2\text{Cl}_2$ ) 0.92;  $^1\text{H}$  NMR ( $\text{CDCl}_3$ , 400 MHz)  $\delta_{\text{H}}$  6.68 (1H, s, H-4), 6.61 (1H, s, H-6), 3.86 (3H, s, OMe), 2.36 (3H, s, 5- $\text{CH}_3$ ), 2.30 (3H, s, 3- $\text{CH}_3$ ), 2.18 (3H, s, 2- $\text{CH}_3$ );  $^{13}\text{C}$  NMR

(CDCl<sub>3</sub>, 100 MHz)  $\delta_C$  157.6 (C-1), 137.6 (C-3), 135.6 (C-5), 123.1 (C-4), 121.9 (C-2), 109.0 (C-6), 55.6 (OMe), 21.4 (5-CH<sub>3</sub>), 20.0 (3-CH<sub>3</sub>), 11.3 (2-CH<sub>3</sub>). The <sup>1</sup>H and <sup>13</sup>C NMR values are in agreement with literature values.<sup>1</sup>

### 2,3,6-Trimethyl-4-anisaldehyde (10)

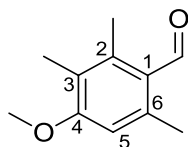

POCl<sub>3</sub> (1.49 mL, 16.0 mmol) was added dropwise to stirring dry DMF (1.23 mL, 16.0 mmol) under N<sub>2</sub> in an ice bath. The reaction mixture warmed to 10 °C after the addition, and then the 2,3,5-trimethylanisole (2.08 g, 13.8 mmol) was added at rt. The mixture was then heated to 110 °C for 6 h. The reaction was then cooled to rt and poured on to ice water (50 mL). CH<sub>2</sub>Cl<sub>2</sub> (20 mL) and NaOAc (6 g) were added to the mixture and stirred for 1 h. The organic layer was separated and the aqueous layer was extracted with CH<sub>2</sub>Cl<sub>2</sub> (3 × 30 mL). The combined organic layers were washed with 2% HCl (20 mL), H<sub>2</sub>O (2 × 30 mL) and then dried (MgSO<sub>4</sub>). The solvent was removed in vacuo, giving the title compound **10** as light yellow crystals (2.02 g, 82%).

**R<sub>f</sub>** (CH<sub>2</sub>Cl<sub>2</sub>) 0.69; **m.p** 62-66 °C (lit.<sup>1</sup> 63-65 °C); **<sup>1</sup>H NMR** (CDCl<sub>3</sub>, 400 MHz)  $\delta_H$  10.53 (1H, s, CHO), 6.56 (1H, s, H-5), 3.87 (3H, s, OMe), 2.60 (3H, s, 6-CH<sub>3</sub>), 2.53 (3H, s, 2-CH<sub>3</sub>), 2.15 (3H, s, 3-CH<sub>3</sub>); **<sup>13</sup>C NMR** (CDCl<sub>3</sub>, 100 MHz)  $\delta_C$  193.0 (CHO), 160.8 (C-4), 141.6 (C-2), 141.3 (C-6), 126.5 (C-1), 124.1 (C-3), 111.0 (C-5), 55.6 (OMe), 21.4 (6-CH<sub>3</sub>), 15.9 (2-CH<sub>3</sub>), 11.3 (3-CH<sub>3</sub>). The <sup>1</sup>H and <sup>13</sup>C NMR values are in agreement with literature values.<sup>1</sup>

#### 4-(4-Methoxy-2,3,6-trimethylphenyl)but-3-en-2-one (12)

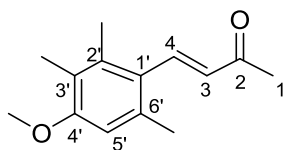

Acetone (15 mL) and H<sub>2</sub>O (5 mL) were added to 2,3,6-trimethyl-4-anisaldehyde (**10**, 0.90 g, 5 mmol). 10% aq NaOH (2.8 mL) was added to the stirring mixture in an ice bath over 30 min. The reaction mixture was allowed to stir for 7 h at rt. The reaction was acidified to pH 5 with AcOH and then the solvent removed in vacuo. The residue was dissolved in Et<sub>2</sub>O (20 mL), washed with sat. NaHCO<sub>3</sub> (20 mL) and H<sub>2</sub>O (3 × 20 mL), dried (MgSO<sub>4</sub>) and the solvent removed in vacuo. The product was purified by silica gel column chromatography (CH<sub>2</sub>Cl<sub>2</sub>), giving the title compound **12** as pale yellow crystals (0.72 g, 66%).

**R<sub>f</sub>** (CH<sub>2</sub>Cl<sub>2</sub>) 0.6; **m.p** 59-61 °C (lit.<sup>1</sup> 55-56 °C); <sup>1</sup>H NMR (CDCl<sub>3</sub>, 400 MHz) δ<sub>H</sub> 7.67 (1H, d, *J* = 16.5 Hz, H-4), 6.60 (1H, s, H-5'), 6.22 (1H, d, *J* = 16.5 Hz, H-3), 3.82 (3H, s, OMe), 2.38 (3H, s, 1-CH<sub>3</sub>), 2.33 (3H, s, 6'-CH<sub>3</sub>), 2.26 (3H, s, 2'-CH<sub>3</sub>), 2.15 (3H, s, 3'-CH<sub>3</sub>); <sup>13</sup>C NMR (CDCl<sub>3</sub>, 100 MHz) δ<sub>C</sub> 198.6 (C-2), 157.6 (C-4'), 143.2 (C-4), 136.7 (C-2'), 135.0 (C-6'), 132.6 (C-3), 126.8 (C-1'), 123.4 (C-3'), 110.3 (C-5'), 55.6 (OMe), 27.5 (C-1), 21.6 (6'-CH<sub>3</sub>), 17.6 (2'-CH<sub>3</sub>), 11.9 (3'-CH<sub>3</sub>). The <sup>1</sup>H and <sup>13</sup>C NMR values are in agreement with literature values.<sup>1</sup>

#### 4-(4-Methoxy-2,3,6-trimethylphenyl)but-3-en-2-ol (14)

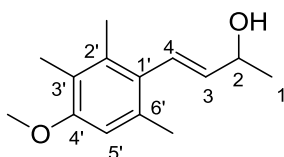

4-(4-Methoxy-2,3,6-trimethylphenyl)but-3-en-2-one **12** (0.431 g, 2.0 mmol) was dissolved in MeOH (1.1 mL), and NaBH<sub>4</sub> (0.075 g, 2.0 mmol) was added to the mixture and allowed to

stir in an ice bath for 10 min. Sat. aq NH<sub>4</sub>Cl (1 mL) was added to quench the reaction and then extracted with EtOAc (2 × 2 mL). The combined organic extracts were dried (MgSO<sub>4</sub>) and solvent removed in vacuo to give the title compound **14** as white crystals (0.415 g, 94%).

**R<sub>f</sub>** (4:1 *n*-hexanes:EtOAc) 0.35; **m.p** 65-67 °C; **IR (ATR)**  $\nu_{\max}$  3312, 2923, 1593, 1456, 1304, 1112 cm<sup>-1</sup>; **<sup>1</sup>H NMR (CDCl<sub>3</sub>, 400 MHz)**  $\delta_{\text{H}}$  6.59 (1H, s, H-5'), 6.50 (1H, d, *J* = 16.1 Hz, H-4), 5.63 (1H, dd, *J* = 16.1, 6.4 Hz, H-3), 4.48 (1H, ddq, *J* = 6.4, 6.4, 0.9 Hz, H-2), 3.81 (3H, s, OMe), 2.28 (3H, s, 6'-CH<sub>3</sub>), 2.21 (3H, s, 2'-CH<sub>3</sub>), 2.14 (3H, s, 3'-CH<sub>3</sub>), 1.39 (3H, d, *J* = 6.4 Hz, H-1); **<sup>13</sup>C NMR (CDCl<sub>3</sub>, 100 MHz)**  $\delta_{\text{C}}$  156.2 (C-4'), 138.8 (C-4), 135.9 (C-2'), 133.8 (C-6'), 129.4 (C-1'), 127.9 (C-3), 122.7 (C-3'), 110.0 (C-5'), 69.5 (C-2), 55.7 (OMe), 23.8 (C-1), 21.4 (6'-CH<sub>3</sub>), 17.4 (2'-CH<sub>3</sub>), 11.9 (3'-CH<sub>3</sub>); ***m/z* (ESI+)**: 243 (MNa<sup>+</sup>, 100 %) and 226 (20). (+)-**HRMS** [M+Na]<sup>+</sup> 243.1353 (calculated for C<sub>14</sub>H<sub>20</sub>O<sub>2</sub>Na, 243.1356).

#### 4-(4-Methoxy-2,3,6-trimethylphenyl)butan-2-ol (**15**)

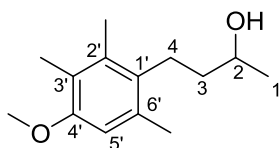

4-(4-Methoxy-2,3,6-trimethylphenyl)but-3-en-2-ol (**14**, 0.415 g, 1.9 mmol) was dissolved in MeOH (14 mL). Pd/C (0.062 g, 0.6 mmol) was added to the mixture and the reaction was purged with H<sub>2</sub>. The reaction was stirred under an atmosphere of H<sub>2</sub> at rt for 2 h. TLC was used to determine the reaction had completed and the Pd/C catalyst was removed by filtration using celite, solvent removed in vacuo and the title compound **15** obtained as white crystals (0.349 g, 83%).

**R<sub>f</sub>** (4:1 *n*-hexanes:EtOAc) 0.39; **m.p** 90-92 °C; **IR (ATR)**  $\nu_{\max}$  3294, 2914, 1594, 1468, 1114 cm<sup>-1</sup>; **<sup>1</sup>H NMR (CDCl<sub>3</sub>, 400 MHz)**  $\delta_{\text{H}}$  6.56 (1H, s, H-5'), 3.87 (1H, dddq, *J* = 5.9, 5.9, 5.9, 0.9 Hz, H-2), 3.78 (3H, s, OMe), 2.80–2.72 (1H, m, H<sub>2</sub>-4a), 2.65–2.57 (1H, m, H<sub>2</sub>-4b), 2.32 (3H, s, 6'-CH<sub>3</sub>), 2.23 (3H, s, 2'-CH<sub>3</sub>), 2.14 (3H, s, 3'-CH<sub>3</sub>), 1.61–1.56 (1H, m, H<sub>2</sub>-2), 1.26 (3H, d, *J* = 5.9 Hz, H-1); **<sup>13</sup>C NMR (CDCl<sub>3</sub>, 100 MHz)**  $\delta_{\text{C}}$  155.4 (C-4'), 136.0 (C-2'), 133.7 (C-6'), 131.0 (C-1'), 123.0 (C-3'), 110.5 (C-5'), 68.5 (C-2), 55.7 (OMe), 39.3 (C-3),

25.9 (C-4), 23.7 (C-1), 20.5 (6'-CH<sub>3</sub>), 15.9 (2'-CH<sub>3</sub>), 12.1 (3'-CH<sub>3</sub>); *m/z* (ESI<sup>+</sup>): 245 (MNa<sup>+</sup>, 100 %) and 227 (15). (+)-HRMS [M+Na]<sup>+</sup> 245.1509 (calculated for C<sub>14</sub>H<sub>22</sub>O<sub>2</sub>Na, 245.1512).

#### 4-(4-Methoxy-2,3,6-trimethylphenyl)butan-2-one (13)

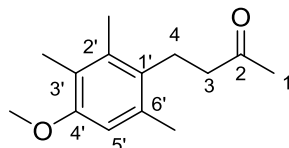

4-(4-Methoxy-2,3,6-trimethylphenyl)butan-2-ol (**15**, 0.349 g, 1.6 mmol) was dissolved in CH<sub>2</sub>Cl<sub>2</sub> (10.2 mL). DMP (1.36 g, 3.2 mmol) was added to the mixture which was then stirred for 1 h. TLC was used to determine the reaction had gone to completion. Sat. aq Na<sub>2</sub>S<sub>2</sub>O<sub>5</sub> (80 mL) was used to quench the reaction, followed by NaHCO<sub>3</sub> (60 mL) and extracted with CH<sub>2</sub>Cl<sub>2</sub> (100 mL). The organic layer was dried (MgSO<sub>4</sub>) and solvent removed in vacuo to give the title compound **13** as pale yellow crystals (0.315 g, 90%).

**R<sub>f</sub>** (4:1 *n*-hexanes: EtOAc) 0.57; **m.p** 83-90 °C (lit.<sup>1</sup> 86.5-87 °C); **<sup>1</sup>H NMR** (CDCl<sub>3</sub>, 400 MHz) δ<sub>H</sub> 6.56 (1H, s, H-5') 3.79 (3H, s, OMe), 2.90–2.86 (2H, m, H<sub>2</sub>-4), 2.57–2.53 (2H, m, H<sub>2</sub>-3), 2.29 (3H, s, 6'-CH<sub>3</sub>), 2.20 (3H, s, 2'-CH<sub>3</sub>), 2.17 (3H, s, 1-CH<sub>3</sub>), 2.14 (3H, s, 3'-CH<sub>3</sub>); **<sup>13</sup>C NMR** (CDCl<sub>3</sub>, 100 MHz) δ<sub>C</sub> 208.6 (C-2), 155.7 (C-4'), 136.0 (C-2'), 133.8 (C-6'), 129.7 (C-1'), 123.2 (C-3'), 110.5 (C-5'), 55.7 (OMe), 43.6 (C-3), 30.0 (C-1), 23.8 (C-4), 20.5 (6'-CH<sub>3</sub>), 15.9 (2'-CH<sub>3</sub>), 12.1 (3'-CH<sub>3</sub>). The <sup>1</sup>H and <sup>13</sup>C NMR values are in agreement with literature values.<sup>1</sup>

#### 5-(4-Methoxy-2,3,6-trimethylphenyl)-3-methylpent-1-yn-3-ol (9)

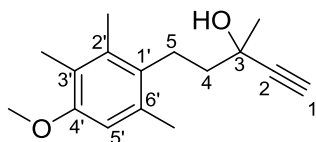

4-(4-Methoxy-2,3,6-trimethylphenyl)butan-2-one (**13**, 91 mg, 4.0 mmol) was dissolved in dry 1:1 THF/Et<sub>2</sub>O (2 mL) at -5 °C under an atmosphere of N<sub>2</sub>. Ethynylmagnesium bromide

solution (0.5 M, 1.0 mL, 4.8 mmol) was added to the mixture and allowed to stir for 3 h at 0 °C. The reaction was quenched with sat. aq NH<sub>4</sub>Cl (5 mL) and the aqueous layer extracted with EtOAc (5 × 10 mL). The organic layer was washed with brine (5 mL) and dried (MgSO<sub>4</sub>). The solvent was removed in vacuo, giving a yellow crude oil. The pure product was obtained through silica gel column chromatography (9:1 *n*-hexanes/EtOAc) affording title compound **9** as a white solid (93 mg, 95%). **R<sub>f</sub>** (**9:1** *n*-hexanes:EtOAc) 0.22; **m.p** 62-66 °C (lit.<sup>2</sup> 55.5-57 °C); **<sup>1</sup>H NMR (CDCl<sub>3</sub>, 400 MHz)** δ<sub>H</sub> 6.57 (1H, s, H-5'), 3.79 (3H, s, OMe), 2.87–2.81 (2H, m, H<sub>2</sub>-5), 2.53 (1H, s, H-1), 2.34 (3H, s, 6'-CH<sub>3</sub>), 2.24 (3H, s, 2'-CH<sub>3</sub>), 2.14 (3H, s, 3'-CH<sub>3</sub>), 1.80–1.74 (2H, m, H<sub>2</sub>-4), 1.58 (3-CH<sub>3</sub>); **<sup>13</sup>C NMR (CDCl<sub>3</sub>, 100 MHz)** δ<sub>C</sub> 155.5 (C-4'), 136.1 (C-2'), 133.8 (C-6'), 130.2 (C-1'), 122.9 (C-3'), 110.5 (C-5'), 87.6 (C-2), 71.7 (C-1), 68.0 (C-3), 55.6 (OMe), 42.9 (C-4), 29.8 (3-CH<sub>3</sub>), 24.8 (C-5), 20.3 (6'-CH<sub>3</sub>), 15.7 (2'-CH<sub>3</sub>), 12.0 (3'-CH<sub>3</sub>). The <sup>1</sup>H and <sup>13</sup>C NMR values are in agreement with literature values.<sup>2</sup>

**Methyl 6-(4-methoxy-2,3,6-trimethylphenyl)-4-((methoxycarbonyl)oxy)-4-methylhex-2-ynoate (19)**

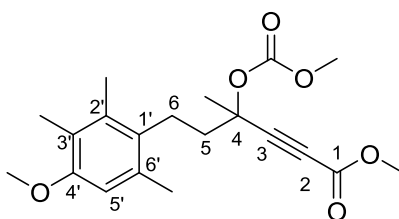

5-(4-Methoxy-2,3,6-trimethylphenyl)-3-methylpent-1-yn-3-ol (**9**, 0.1 g, 0.4 mmol) was dissolved in THF (2 mL). *n*-BuLi (1.6 M, 0.5 mL, 0.8 mmol) was added dropwise to the solution at 0 °C. The reaction was then stirred at this temperature for 30 min. Methyl chloroformate (0.06 mL, 0.8 mmol) was added to the reaction and allowed to stir at rt for 2 h. TLC was used to determine that the reaction had gone to completion. The reaction was quenched with H<sub>2</sub>O (5 mL) and extracted with CH<sub>2</sub>Cl<sub>2</sub> (5 mL). The aqueous layer was further extracted with Et<sub>2</sub>O (5 mL) and dried (MgSO<sub>4</sub>), solvent removed in vacuo to give a yellow crude oil. The compound was purified using silica gel chromatography (9:1 *n*-hexane/EtOAc), yielding the title compound **19** a colourless oil (0.063 g, 43%). **<sup>1</sup>H NMR (CDCl<sub>3</sub>, 400 MHz)** δ<sub>H</sub> 6.56 (1H, s, H-5'), 3.81 (3H, s, OMe), 3.80 (3H, s, OMe), 3.79 (3H, s, OMe), 2.75 (2H, pd, *J* = 5.2, 13.6 Hz, H<sub>2</sub>-6), 2.32 (3H, s, 6'-CH<sub>3</sub>), 2.23 (3H, s, 2'-CH<sub>3</sub>), 2.14

(3H, s, 3'-CH<sub>3</sub>), 2.12–2.06 (1H, m, H<sub>2</sub>-5a), 2.01-1.93 (1H, m, H<sub>2</sub>-5b), 1.83 (3-CH<sub>3</sub>); <sup>13</sup>C NMR (CDCl<sub>3</sub>, 100 MHz) δ<sub>C</sub> 155.7 (C-4'), 153.7 (C=O), 153.6 (C=O), 136.1 (C-2'), 133.9 (C-6'), 129.2 (C-1'), 123.1 (C-3'), 110.5 (C-5'), 86.3 (C-3), 77.4 (C-2), 76.0 (C-4), 55.7 (OMe), 54.9 (OMe), 53.0 (OMe), 40.5 (C-5), 25.7 (4-CH<sub>3</sub>), 24.2 (C-6), 20.3 (6'-CH<sub>3</sub>), 15.7 (2'-CH<sub>3</sub>), 12.1 (3'-CH<sub>3</sub>). In a separate fraction, **18** (0.021 g, 17%) as a pale yellow oil (see below for full characterisation data).

#### 5-(4-Methoxy-2,3,6-trimethylphenyl)-3-methylpent-1-yn-3-yl methyl carbonate (**18**)

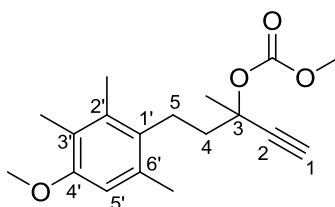

5-(4-Methoxy-2,3,6-trimethylphenyl)-3-methylpent-1-yn-3-ol (**9**, 0.1 g, 0.4 mmol) was dissolved in THF (2 mL). *n*-BuLi (1.6 M, 0.5 mL, 0.8 mmol) was added dropwise to the solution stirring at 0 °C. The reaction was then stirred at this temperature for 30 min. Methyl chloroformate (0.46 mL, 0.6 mmol) was added to the reaction and allowed to stir at rt for 2 h. TLC was used to determine that the reaction had gone to completion. The reaction was quenched with H<sub>2</sub>O (5 mL) and extracted with CH<sub>2</sub>Cl<sub>2</sub> (5 mL). The aqueous layer was further extracted with Et<sub>2</sub>O (5 mL) and dried (MgSO<sub>4</sub>), solvent removed in vacuo to give a yellow crude oil. The compound was purified using silica gel chromatography (9:1 *n*-hexane/EtOAc), yielding the title compound **18** a pale yellow oil (0.062 g, 51%). **R<sub>f</sub>** (**9:1 n-hexanes:EtOAc**) 0.53; <sup>1</sup>H NMR (CDCl<sub>3</sub>, 400 MHz) δ<sub>H</sub> 6.58 (1H, s, H-5'), 3.80 (3H, s, OMe), 3.80 (3H, s, OMe), 2.90–2.81 (2H, m, H<sub>2</sub>-5), 2.69 (1H, s, H-1), 2.35 (3H, s, 6'-CH<sub>3</sub>), 2.26 (3H, s, 2'-CH<sub>3</sub>), 2.15 (3H, s, 3'-CH<sub>3</sub>), 2.14–2.06 (1H, m, H<sub>2</sub>-4a), 1.96-1.88 (1H, m, H<sub>2</sub>-4b), 1.82 (3-CH<sub>3</sub>); <sup>13</sup>C NMR (CDCl<sub>3</sub>, 100 MHz) δ<sub>C</sub> 155.6 (C-4'), 153.8 (C=O), 136.1 (C-2'), 133.9 (C-6'), 129.6 (C-1'), 123.0 (C-3'), 110.5 (C-5'), 83.1 (C-2), 76.8 (C-3), 74.2 (C-1), 55.6 (OMe), 54.5 (OMe), 40.9 (C-4), 26.3 (3-CH<sub>3</sub>), 24.3 (C-5), 20.3 (6'-CH<sub>3</sub>), 15.7 (2'-CH<sub>3</sub>), 12.0 (3'-CH<sub>3</sub>). The <sup>1</sup>H and <sup>13</sup>C NMR values are in agreement with literature values.<sup>2</sup>



### 4-Hydroxyphenyl acetate (16)

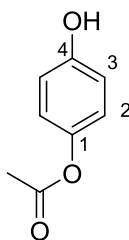

Hydroquinone (1.0 g, 9.1 mmol) was dissolved in AcOH (2 mL) under N<sub>2</sub>. Acetic anhydride (0.43 mL, 4.5 mmol) was added dropwise to the mixture over 30 min. The mixture was allowed to stir at 110 °C for 2 h. The solvent was removed in vacuo and the crude mixture was dissolved in toluene. Unreacted starting material was removed by filtration and the solvent was removed in vacuo affording title compound **16** as a pale brown-yellow solid (0.55 g, 40%). **R<sub>f</sub>** (2:1 *n*-hexanes: EtOAc) 0.77; **m.p** 50-52 °C (lit.<sup>3</sup> 60-62 °C); **<sup>1</sup>H NMR** (CDCl<sub>3</sub>, 400 MHz) δ<sub>H</sub> 6.88 (2H, d, *J*= 8.8 Hz, H-2), 6.71 (2H, d, *J*= 8.9 Hz, H-3), 2.28 (3H, s, COCH<sub>3</sub>); **<sup>13</sup>C NMR** (CDCl<sub>3</sub>, 100 MHz) δ<sub>C</sub> 170.9 (COCH<sub>3</sub>), 153.7 (C-4), 144.0 (C-1), 122.4 (C-2), 116.2 (C-3), 21.2 (COCH<sub>3</sub>). The <sup>1</sup>H and <sup>13</sup>C NMR values are in agreement with literature values.<sup>3</sup>

### 4-((5-(4-Methoxy-2,3,6-trimethylphenyl)-3-methylpent-1-yn-3-yl)oxy)phenyl acetate (8) and 4-((5-(4-methoxy-2,3,6-trimethylphenyl)-3-methylpent-1-yn-3-yl)oxy)phenol (20)

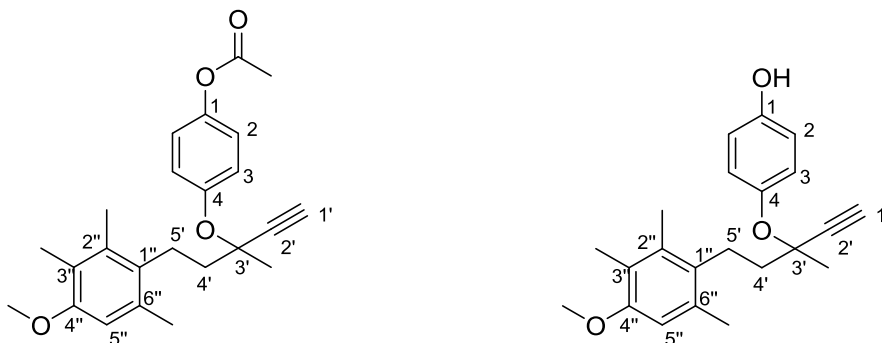

The phenol **16** (98 mg, 0.64 mmol) was dissolved in MeCN (0.7 mL). Anhydrous copper(II) chloride (0.01 mg, 0.064 mmol) and DBU (0.12 mL, 0.83 mmol) was added to the mixture at -20 °C and stirred for 15 min. The carbonate **18** (195 mg, 0.64 mmol) in MeCN (1.8 mL) was then added dropwise and stirred overnight at 0 °C. The reaction was quenched with H<sub>2</sub>O

(5 mL) and extracted with Et<sub>2</sub>O (3 × 5 mL). The organic layer was dried (MgSO<sub>4</sub>) and the solvent removed in vacuo. A brown crude oil purified using silica gel column chromatography (4:1 *n*-hexanes/EtOAc) yielded title compound **6** as a pale yellow oil (42 mg, 17 %) and title compound **20** as a colourless oil (45 mg, 21%).

#### **4-((5-(4-Methoxy-2,3,6-trimethylphenyl)-3-methylpent-1-yn-3-yl)oxy)phenyl acetate (8)**

**R<sub>f</sub>** (4:1 *n*-hexanes:EtOAc) 0.51; **IR** (ATR)  $\nu_{\max}$  3282, 2936, 2153, 1761, 1596, 1500, 1466, 1369, 1212, 1171, 1118, 1091, 1013 cm<sup>-1</sup>; **<sup>1</sup>H NMR** (CD<sub>3</sub>OD, 400 MHz)  $\delta_{\text{H}}$  7.23 (2H, d, *J* = 9.1 Hz, H-2), 7.00 (2H, d, *J* = 9.1 Hz, H-3), 6.58 (1H, s, H-5''), 3.75 (3H, s, OMe), 3.14 (1H, s, H-1'), 2.99–2.83 (2H, m, H<sub>2</sub>-5'), 2.28 (3H, s, 6''-CH<sub>3</sub>), 2.25 (3H, s, OCOCH<sub>3</sub>), 2.21 (3H, s, 2''-CH<sub>3</sub>), 2.09 (3H, s, 3''-CH<sub>3</sub>), 1.98–1.85 (2H, m, H<sub>2</sub>-4'), 1.62 (3'-CH<sub>3</sub>); **<sup>13</sup>C NMR** (CD<sub>3</sub>OD, 100 MHz)  $\delta_{\text{C}}$  171.4 (OCOCH<sub>3</sub>), 156.8 (C-4''), 154.6 (C-4), 147.6 (C-1), 136.7 (C-2''), 134.8 (C-6''), 131.2 (C-1''), 123.6 (C-3''), 123.3 (C-2), 123.0 (C-3) 111.5 (C-5''), 85.8 (C-2'), 77.3 (C-1'), 77.0 (C-3'), 56.0 (OMe), 43.3 (C-4'), 27.3 (3'-CH<sub>3</sub>), 25.5 (C-5'), 20.9 (OCOCH<sub>3</sub>), 20.4 (6''-CH<sub>3</sub>), 15.8 (2''-CH<sub>3</sub>), 12.1 (3''-CH<sub>3</sub>); ***m/z*** (ESI<sup>+</sup>): 403 (MNa<sup>+</sup>, 100 %), 341 (90), 265 (50) and 168 (80); (+)-**HRMS** [M+Na]<sup>+</sup> 403.1869 (calculated for C<sub>24</sub>H<sub>28</sub>O<sub>4</sub>Na, 403.1880).

#### **4-((5-(4-Methoxy-2,3,6-trimethylphenyl)-3-methylpent-1-yn-3-yl)oxy)phenol (20)**

**R<sub>f</sub>** (4:1 *n*-hexanes:EtOAc) 0.30; **IR** (ATR)  $\nu_{\max}$  3394, 3273, 2984, 2112, 1596, 1505, 1449, 1369, 1279, 1214, 1174, 1116 cm<sup>-1</sup>; **<sup>1</sup>H NMR** (CDCl<sub>3</sub>, 400 MHz)  $\delta_{\text{H}}$  7.10 (2H, d, *J* = 8.9 Hz, H-3), 6.74 (2H, d, *J* = 8.9 Hz, H-2), 6.59 (1H, s, H-5''), 4.91 (1H, br s, OH), 3.81 (3H, s, OMe), 3.02–2.85 (2H, m, H<sub>2</sub>-5'), 2.63 (1H, s, H-1'), 2.35 (3H, s, 6''-CH<sub>3</sub>), 2.26 (3H, s, 2''-CH<sub>3</sub>), 2.16 (3H, s, 3''-CH<sub>3</sub>), 2.04–1.86 (2H, m, H<sub>2</sub>-4'), 1.61 (3'-CH<sub>3</sub>); **<sup>13</sup>C NMR** (CDCl<sub>3</sub>, 100 MHz)  $\delta_{\text{C}}$  155.5 (C-4''), 151.7 (C-4), 149.2 (C-1), 136.3 (C-2''), 134.0 (C-6''), 130.4 (C-1''), 123.8 (C-3), 123.0 (C-3''), 115.5 (C-2) 110.6 (C-5''), 85.3 (C-2'), 76.1 (C-3'), 75.3 (C-1'), 55.7 (OMe), 42.1 (C-4'), 27.0 (3'-CH<sub>3</sub>), 24.8 (C-5'), 20.4 (6''-CH<sub>3</sub>), 15.8 (2''-CH<sub>3</sub>), 12.1 (3''-CH<sub>3</sub>); ***m/z*** (ESI<sup>+</sup>): 361 (MNa<sup>+</sup>, 100 %) and 217 (15); (+)-**HRMS** [M+Na]<sup>+</sup> 361.1774 (calculated for C<sub>22</sub>H<sub>26</sub>O<sub>3</sub>Na, 361.1778).

**4-((5-(4-Methoxy-2,3,6-trimethylphenyl)-3-methylpent-1-yn-3-yl)oxy)phenyl acetate (8)**

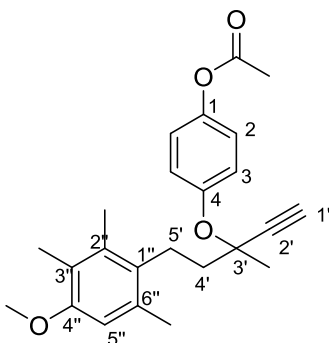

Phenol **20** (19 mg, 0.056 mmol) was dissolved in pyridine (0.05 mL) and stirred under N<sub>2</sub>. Acetic anhydride (0.05 mL, 0.56 mmol) was added to the mixture, dropwise and was then allowed to stir at rt for 1.5 h. The reaction was quenched with H<sub>2</sub>O (5 mL) and extracted with CH<sub>2</sub>Cl<sub>2</sub> (5 mL). The organic layer was then washed with NH<sub>4</sub>Cl (5 mL), water (5 mL) and dried (MgSO<sub>4</sub>). The solvent was removed in vacuo giving the crude product as a colourless oil. The compound was purified using silica gel chromatography (4:1 *n*-hexanes/EtOAc), yielding the title compound **8** a colourless oil (0.014 g, 66%). Data as reported above.

### *O*-Acetyl panicein A<sub>2</sub> (**21**)

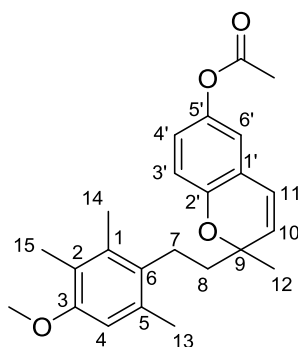

The phenyl acetate **8** (42 mg, 0.1 mmol) was degassed in a solution of toluene (8 mL) and heated in an atmosphere of N<sub>2</sub> under reflux for 2 days. The solvent was removed in vacuo and the crude product was purified using silica gel column chromatography (4:1 *n*-hexanes/EtOAc) to give the title compound **21** in a 1:1 mixture of starting material and product. The product was used immediately without further purification.

**R<sub>f</sub>** (4:1 *n*-hexanes:EtOAc) 0.54; <sup>1</sup>H NMR (CDCl<sub>3</sub>, 400 MHz) δ<sub>H</sub> 6.82 (1H, d, *J* = 2.8 Hz, H-4'), 6.82 (1H, s, H-6'), 6.74 (1H, d, *J* = 2.8 Hz, H-3'), 6.55 (1H, s, H-4), 6.36 (1H, d, *J* = 9.8 Hz, H-11), 5.68 (1H, d, *J* = 9.8, H-10), 3.81 (3H, s, OMe), 2.82–2.69 (2H, m, H<sub>2</sub>-7), 2.29 (3H, s, OCOCH<sub>3</sub>), 2.27 (3H, s, H<sub>3</sub>-13), 2.20 (3H, s, H<sub>3</sub>-14), 2.14 (3H, s, H<sub>3</sub>-15), 1.85–1.73 (2H, m, H<sub>2</sub>-8), 1.65 (H<sub>3</sub>-12); <sup>13</sup>C NMR (CDCl<sub>3</sub>, 100 MHz) δ<sub>C</sub> 169.9 (OCOCH<sub>3</sub>), 155.4 (C-3), 151.0 (C-2'), 144.2 (C-5'), 136.0 (C-1), 133.7 (C-5), 130.3 (C-10), 130.3 (C-6), 123.0 (C-2), 123.0 (C-1'), 122.8 (C-11), 121.9 (C-4'), 119.2 (C-3'), 116.7 (C-6'), 110.5 (C-4), 79.0 (C-9), 55.7 (OMe), 41.0 (C-8), 26.5 (C-12), 24.1 (C-7), 21.2 (OCOCH<sub>3</sub>), 20.4 (C-13), 15.7 (C-14), 12.1 (C-15).

***tert*-Butyl(4-((5-(4-methoxy-2,3,6-trimethylphenyl)-3-methylpent-1-yn-3-yl)oxy)phenoxy)dimethylsilane (**22**)**

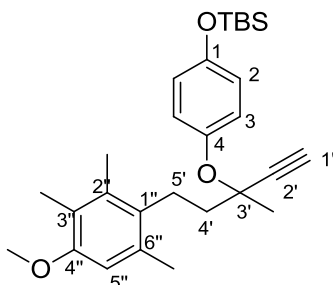

To a solution of phenol **20** (22 mg, 0.065 mmol) in  $\text{CH}_2\text{Cl}_2$  (2 mL) with DIPEA (0.045 mL, 0.26 mmol) stirred under an atmosphere of  $\text{N}_2$  at 0 °C was added TBSCl (0.28 mL, 0.16 mmol). The solution was allowed to warm to room temperature and was stirred for 24 h. Sat. aq  $\text{NaHCO}_3$  (2 mL) was added and the layers separated. The aqueous layer was extracted with ether (3  $\times$  3 mL) and the combined organic extracts were dried ( $\text{MgSO}_4$ ). The solvent was removed in vacuo giving the crude product as colourless oil. The compound was purified using silica gel chromatography (4:1 *n*-hexanes/EtOAc), yielding the title compound **22** a colourless oil (5.3 mg, 18%).

**$^1\text{H}$  NMR ( $\text{CDCl}_3$ , 400 MHz)**  $\delta_{\text{H}}$  7.09 (2H, d,  $J = 8.0$  Hz, H-2), 6.74 (2H, d,  $J = 8.0$  Hz, H-3), 6.56 (1H, s, H-5''), 3.79 (3H, s, OMe), 3.00–2.83 (2H, m,  $\text{H}_2$ -5'), 2.61 (1H, s, H-1'), 2.32 (3H, s, 6''- $\text{CH}_3$ ), 2.24 (3H, s, 2''- $\text{CH}_3$ ), 2.14 (3H, s, 3''- $\text{CH}_3$ ), 2.01–1.85 (2H, m,  $\text{H}_2$ -4'), 1.59 (3'- $\text{CH}_3$ ), 0.98 (9H, s,  $\text{Si}(\text{CH}_3)_2\text{C}(\text{CH}_3)_3$ ), 0.18 (9H, s,  $\text{Si}(\text{CH}_3)_2\text{C}(\text{CH}_3)_3$ );  **$^{13}\text{C}$  NMR ( $\text{CDCl}_3$ , 100 MHz)**  $\delta_{\text{C}}$  155.4 (C-4''), 151.6 (C-4), 149.7 (C-1), 136.3 (C-2''), 134.0 (C-6''), 130.4 (C-1''), 123.2 (C-3''), 123.0 (C-2), 120.2 (C-3), 110.5 (C-5''), 85.4 (C-2'), 75.8 (C-3'), 75.1 (C-1'), 55.7 (OMe), 42.1 (C-4'), 29.8 (3'- $\text{CH}_3$ ), 27.0 (C-5'), 25.8 ( $\text{Si}(\text{CH}_3)_2\text{C}(\text{CH}_3)_3$ ), 24.7 ( $\text{Si}(\text{CH}_3)_2\text{C}(\text{CH}_3)_3$ ), 20.4 (6''- $\text{CH}_3$ ), 15.8 (2''- $\text{CH}_3$ ), 12.1 (3''- $\text{CH}_3$ ), -4.3 ( $\text{Si}(\text{CH}_3)_2\text{C}(\text{CH}_3)_3$ ).

### *O*-TBS panicein A<sub>2</sub> (**23**)

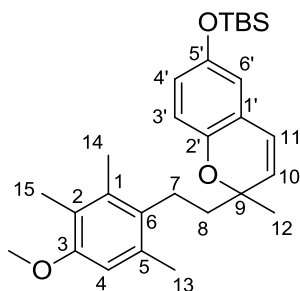

The phenyl silane **22** (5.3 mg, 0.012 mmol) was degassed in a solution of toluene (4 mL) and heated in an atmosphere of N<sub>2</sub> under reflux for 2 days. The solvent was removed in vacuo and the crude product was purified using silica gel column chromatography (4:1 *n*-hexanes/EtOAc) to give the title compound **23** in a 1:2 mixture of starting material and product.

**<sup>1</sup>H NMR (CDCl<sub>3</sub>, 400 MHz)** δ<sub>H</sub> 6.69 (1H, d, *J* = 8.0 Hz, H-4'), 6.60 (1H, dd, *J* = 8.0 and 2.4 Hz, H-6'), 6.53 (1H, s, H-4), 6.48 (1H, d, *J* = 2.4 Hz, H-3'), 6.33 (1H, d, *J* = 9.8 Hz, H-11), 5.65 (1H, d, *J* = 9.8, H-10), 3.77 (3H, s, OMe), 2.79–2.70 (2H, m, H<sub>2</sub>-7), 2.26 (3H, s, H<sub>3</sub>-13), 2.17 (3H, s, H<sub>3</sub>-14), 2.11 (3H, s, H<sub>3</sub>-15), 1.78–1.72 (2H, m, H<sub>2</sub>-8), 1.45 (H<sub>3</sub>-12), 0.98 (9H, s, Si(CH<sub>3</sub>)<sub>2</sub>C(CH<sub>3</sub>)<sub>3</sub>), 0.17 (9H, s, Si(CH<sub>3</sub>)<sub>2</sub>C(CH<sub>3</sub>)<sub>3</sub>); **<sup>13</sup>C NMR (CDCl<sub>3</sub>, 100 MHz)** δ<sub>C</sub> 155.4 (C-3), 151.4 (C-2'), 145.8 (C-5'), 135.9 (C-1), 133.6 (C-5), 130.2 (C-10), 130.2 (C-6), 123.2 (C-2), 123.2 (C-1'), 122.9 (C-11), 120.2 (C-3'), 117.5 (C-4'), 116.6 (C-6'), 110.4 (C-4), 78.0 (C-9), 55.6 (OMe), 40.3 (C-8), 26.9 (C-12), 25.9 (Si(CH<sub>3</sub>)<sub>2</sub>C(CH<sub>3</sub>)<sub>3</sub>), 25.7 (Si(CH<sub>3</sub>)<sub>2</sub>C(CH<sub>3</sub>)<sub>3</sub>), 23.9 (C-7), 20.3 (C-13), 15.6 (C-14), 12.0 (C-15), -4.5 (Si(CH<sub>3</sub>)<sub>2</sub>C(CH<sub>3</sub>)<sub>3</sub>).

## Panicein A<sub>2</sub> (5)

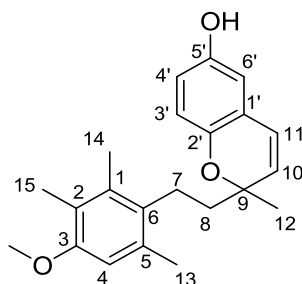

A mixture of chromenol acetate **21** and phenyl acetate **8** (0.019 g, 0.05 mmol) was dissolved in MeOH (1 mL), followed by the addition of aq KOH (1 M, 0.05 mL). The mixture was allowed to stir for 2.5 h, neutralised with AcOH (0.05 mL) and extracted with H<sub>2</sub>O (5 mL) and EtOAc (3 × 5 mL). The combined organic layers were dried (MgSO<sub>4</sub>) and the solvent removed in vacuo to give the crude product which was purified by silica gel column chromatography (9:1 *n*-hexanes/EtOAc), to give the title compound **5** as a pale yellow oil (13.5 mg, 80%).

**R<sub>f</sub>** (4:1 *n*-hexanes:EtOAc) 0.32; **IR** (ATR)  $\nu_{\max}$  3321, 2934, 2252, 1650, 1532, 1453, 1362, 1221, 1116 cm<sup>-1</sup>; **<sup>1</sup>H NMR** (CD<sub>3</sub>OD, 500 MHz)  $\delta_{\text{H}}$  6.61 (1H, d, *J* = 8.6 Hz, H-3'), 6.54 (1H, dd, *J* = 8.6, 2.8 Hz, H-4'), 6.54 (1H, s, H-4), 6.47 (1H, d, *J* = 2.8 Hz, H-6'), 6.34 (1H, d, *J* = 9.8 Hz, H-11), 5.71 (1H, d, *J* = 9.8 Hz, H-10), 3.73 (3H, s, OMe), 2.78–2.66 (2H, m, H<sub>2</sub>-7), 2.22 (3H, s, H-13), 2.14 (3H, s, H-14), 2.06 (3H, s, H-15), 1.72–1.65 (2H, m, H<sub>2</sub>-8), 1.41 (1H, s, H-12); **<sup>13</sup>C NMR** (CD<sub>3</sub>OD, 125 MHz)  $\delta_{\text{C}}$  156.6 (C-3), 152.1 (C-2'), 147.5 (C-5'), 136.5 (C-1), 134.6 (C-5), 131.9 (C-6), 131.6 (C-10), 124.2 (C-11), 123.5 (C-2), 123.2 (C-1'), 117.5 (C-3'), 116.4 (C-4'), 113.8 (C-6'), 111.4 (C-4), 79.1 (C-9), 56.0 (OMe), 41.4 (C-8), 26.2 (C-12), 24.9 (C-7), 20.4 (C-13), 15.8 (C-14), 12.0 (C-15); ***m/z*** (ESI<sup>+</sup>): 361 (MNa<sup>+</sup>, 100 %) (+)-**HRMS** [M+Na]<sup>+</sup> 361.1774 (calculated for C<sub>22</sub>H<sub>26</sub>O<sub>3</sub>Na, 361.1778). The <sup>1</sup>H and <sup>13</sup>C NMR values are in agreement with literature values.<sup>4</sup>

**Comparison of the NMR data obtained from the isolation of panicein A<sub>2</sub> (5) and the NMR data of the synthetic panicein A<sub>2</sub> (5).**

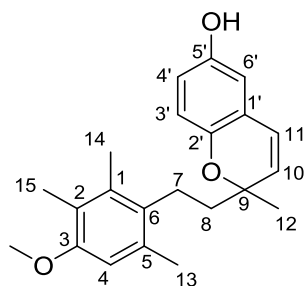

**Table 1:** <sup>1</sup>H NMR Values (CD<sub>3</sub>OD) observed for synthetic (5) versus literature.

| Atom no.         | Isolated panicein A <sub>2</sub> (5)<br>(400 MHz, CD <sub>3</sub> OD) <sup>4</sup> | Synthetic panicein A <sub>2</sub> (5)<br>(500 MHz, CD <sub>3</sub> OD) |
|------------------|------------------------------------------------------------------------------------|------------------------------------------------------------------------|
| H-4              | 6.53 (1H, s)                                                                       | 6.54 (1H, s)                                                           |
| H-7              | 2.71 (2H, m)                                                                       | 2.78–2.66 (2H, m)                                                      |
| H-8              | 1.68 (2H, m)                                                                       | 1.72–1.65 (2H, m)                                                      |
| H-10             | 5.71 (1H, d, <i>J</i> = 9.8 Hz)                                                    | 5.71 (1H, d, <i>J</i> = 9.8 Hz)                                        |
| H-11             | 6.35 (1H, d, <i>J</i> = 9.8 Hz)                                                    | 6.34 (1H, d, <i>J</i> = 9.8 Hz)                                        |
| H-12             | 1.40 (3H, s)                                                                       | 1.41 (3H, s)                                                           |
| H-13             | 2.22 (3H, s)                                                                       | 2.22 (3H, s)                                                           |
| H-14             | 2.13 (3H, s)                                                                       | 2.14 (3H, s)                                                           |
| H-15             | 2.06 (3H, s)                                                                       | 2.06 (3H, s)                                                           |
| OCH <sub>3</sub> | 3.72 (3H, s)                                                                       | 3.73 (3H, s)                                                           |
| H-3'             | 6.60 (1H, d, <i>J</i> = 8.6 Hz)                                                    | 6.61 (1H, d, <i>J</i> = 8.6 Hz)                                        |
| H-4'             | 6.54 (1H, dd, <i>J</i> = 8.6, 2.8 Hz)                                              | 6.54 (1H, dd, <i>J</i> = 8.6, 2.8 Hz)                                  |
| H-6'             | 6.46 (1H, d, <i>J</i> = 2.8 Hz)                                                    | 6.47 (1H, d, <i>J</i> = 2.8 Hz)                                        |



**Table 2.**  $^{13}\text{C}$  NMR Values ( $\text{CD}_3\text{OD}$ ) observed for synthetic (**5**) versus literature.

| Atom no.          | Isolated panicein A <sub>2</sub> ( <b>5</b> )<br>(100 MHz, $\text{CD}_3\text{OD}$ ) <sup>4</sup> | Synthetic panicein A <sub>2</sub> ( <b>5</b> )<br>(125 MHz, $\text{CD}_3\text{OD}$ ) |
|-------------------|--------------------------------------------------------------------------------------------------|--------------------------------------------------------------------------------------|
| C-1               | 135.4                                                                                            | 136.5                                                                                |
| C-2 <sup>a</sup>  | 122.6                                                                                            | 123.5                                                                                |
| C-3               | 155.3                                                                                            | 156.6                                                                                |
| C-4               | 110.7                                                                                            | 111.4                                                                                |
| C-5               | 133.6                                                                                            | 134.6                                                                                |
| C-6               | 130.9                                                                                            | 131.9                                                                                |
| C-7               | 25.2                                                                                             | 24.9                                                                                 |
| C-8               | 41.5                                                                                             | 41.4                                                                                 |
| C-9               | 78.7                                                                                             | 79.1                                                                                 |
| C-10              | 130.6                                                                                            | 131.6                                                                                |
| C-11              | 123.3                                                                                            | 124.2                                                                                |
| C-12              | 26.5                                                                                             | 26.2                                                                                 |
| C-13              | 20.8                                                                                             | 20.4                                                                                 |
| C-14              | 16.2                                                                                             | 15.8                                                                                 |
| C-15              | 12.5                                                                                             | 12.0                                                                                 |
| OCH <sub>3</sub>  | 55.8                                                                                             | 56.0                                                                                 |
| C-1 <sup>aa</sup> | 122.3                                                                                            | 123.2                                                                                |
| C-2'              | 150.9                                                                                            | 152.1                                                                                |
| C-3'              | 116.7                                                                                            | 117.5                                                                                |
| C-4'              | 115.6                                                                                            | 116.4                                                                                |
| C-5'              | 146.4                                                                                            | 147.5                                                                                |
| C-6'              | 113.0                                                                                            | 113.8                                                                                |

a) Notates interchangeable signals

## NCI results data sheet of synthetic panicein A<sub>2</sub> (5)

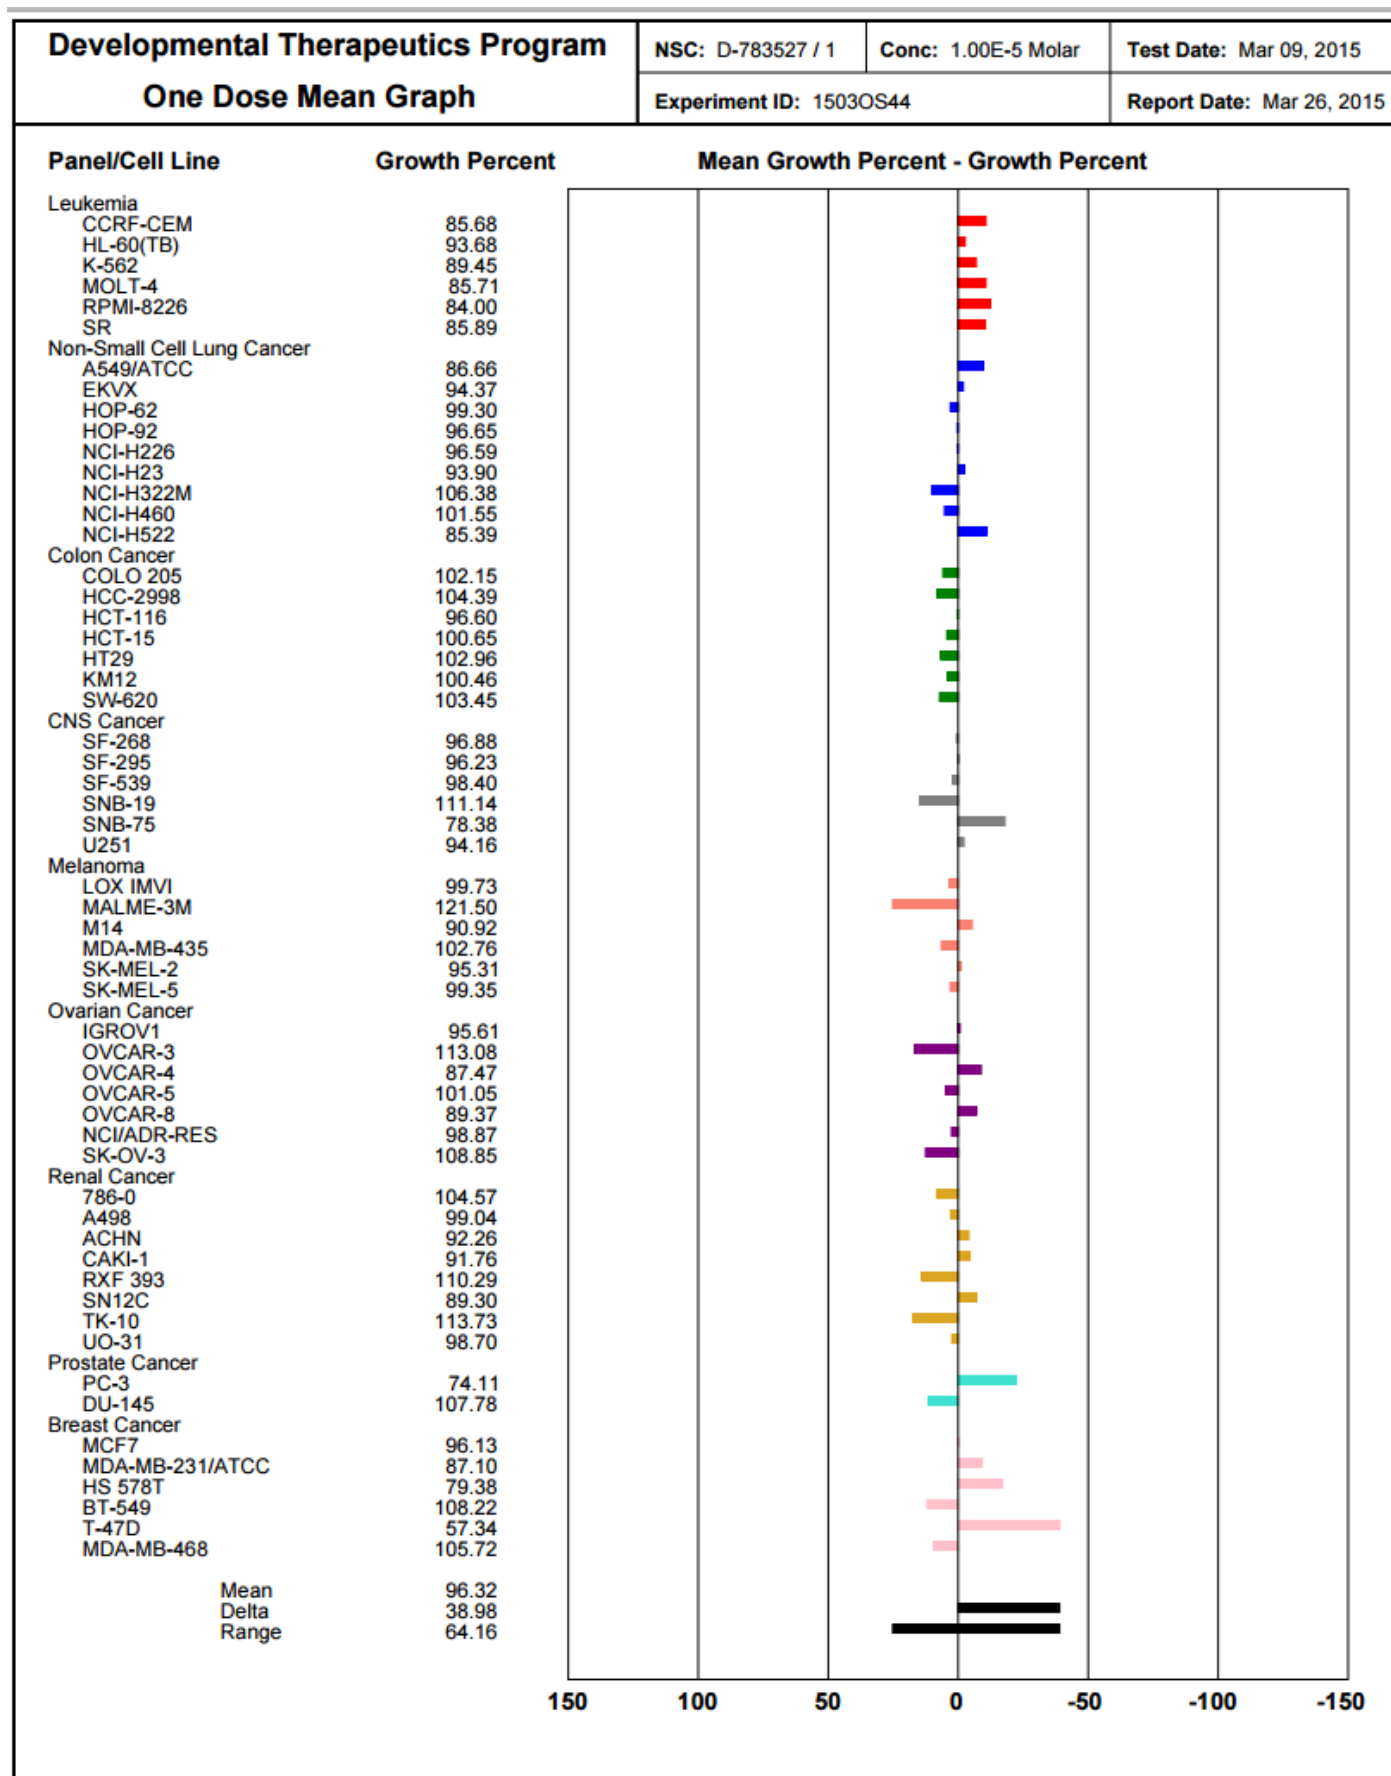

## References:

- (1) Samokhvalov, G. I.; Zakharova, N. I.; Sokolova, N. N.; Filippova, T. M.; Raigorodskaya, O. I.; Murav'ev, V. V.; Tuguzova, A. M.; Khristoforov, V. L. *Pharm. Chem. J.* **1994**, 28, 343–348.
- (2) Davis, C. J.; Hurst, T. E.; Jacob, A. M.; Moody, C. J. *J. Org. Chem.* **2005**, 70, 4414–4422.
- (3) Kim, B.-T.; Kim, K.-H.; Kim, K.-S.; Lee, Y.-S.; Min, Y.-K.; Park, N.-K. Mono carbonylation of benzene diols. WO2003033449 A1, April 24, 2003.
- (4) Zubía, E.; J. Ortega, M.; Luis Carballo, J.; Salvá, J. *Tetrahedron* **1994**, 50, 8153–8160.
