# Supplementary material for: Total synthesis of panicein A2
Source: publisher site journal article supplement (doi:10.3762/bjoc.11.215), 2015-10-26
Supplement: Additional file 2 [file 1860-5397-11-215-S2.pdf]

# Supporting Information File 2

for

## Total synthesis of panicein A<sub>2</sub>

Lili Yeung, Lisa I. Pilkington, Melissa M. Cadelis, Brent R. Copp and David Barker\*

Address: School of Chemical Sciences, University of Auckland, 23 Symonds Street,  
Auckland, New Zealand

Email: David Barker - d.barker@auckland.ac.nz

\* Corresponding author

### <sup>1</sup>H/<sup>13</sup>C NMR spectra of synthesised compounds

#### Contents:

|                                                                               |         |
|-------------------------------------------------------------------------------|---------|
| <sup>1</sup> H NMR and <sup>13</sup> C NMR spectra for 2,3,5-trimethylanisole | S3,S4   |
| <sup>1</sup> H NMR and <sup>13</sup> C NMR spectra for <b>10</b>              | S5,S6   |
| <sup>1</sup> H NMR and <sup>13</sup> C NMR spectra for <b>12</b>              | S7,S8   |
| <sup>1</sup> H NMR and <sup>13</sup> C NMR spectra for <b>14</b>              | S9,S10  |
| <sup>1</sup> H NMR and <sup>13</sup> C NMR spectra for <b>15</b>              | S11,S12 |
| <sup>1</sup> H NMR and <sup>13</sup> C NMR spectra for <b>13</b>              | S13,S14 |
| <sup>1</sup> H NMR and <sup>13</sup> C NMR spectra for <b>9</b>               | S15,S16 |
| <sup>1</sup> H NMR and <sup>13</sup> C NMR spectra for <b>19</b>              | S17,S18 |
| <sup>1</sup> H NMR and <sup>13</sup> C NMR spectra for <b>18</b>              | S19,S20 |

|                                                                              |         |
|------------------------------------------------------------------------------|---------|
| $^1\text{H}$ NMR and $^{13}\text{C}$ NMR spectra for <b>16</b>               | S21,S22 |
| $^1\text{H}$ NMR and $^{13}\text{C}$ NMR spectra for <b>8</b>                | S23,S24 |
| $^1\text{H}$ NMR and $^{13}\text{C}$ NMR spectra for <b>20</b>               | S25,S26 |
| $^1\text{H}$ NMR and $^{13}\text{C}$ NMR spectra for <b>20</b> and <b>21</b> | S27,S28 |
| $^1\text{H}$ NMR and $^{13}\text{C}$ NMR spectra for <b>22</b>               | S29,S30 |
| $^1\text{H}$ NMR and $^{13}\text{C}$ NMR spectra for <b>22</b> and <b>23</b> | S31,S32 |
| $^1\text{H}$ NMR and $^{13}\text{C}$ NMR spectra for <b>5</b>                | S33,S34 |

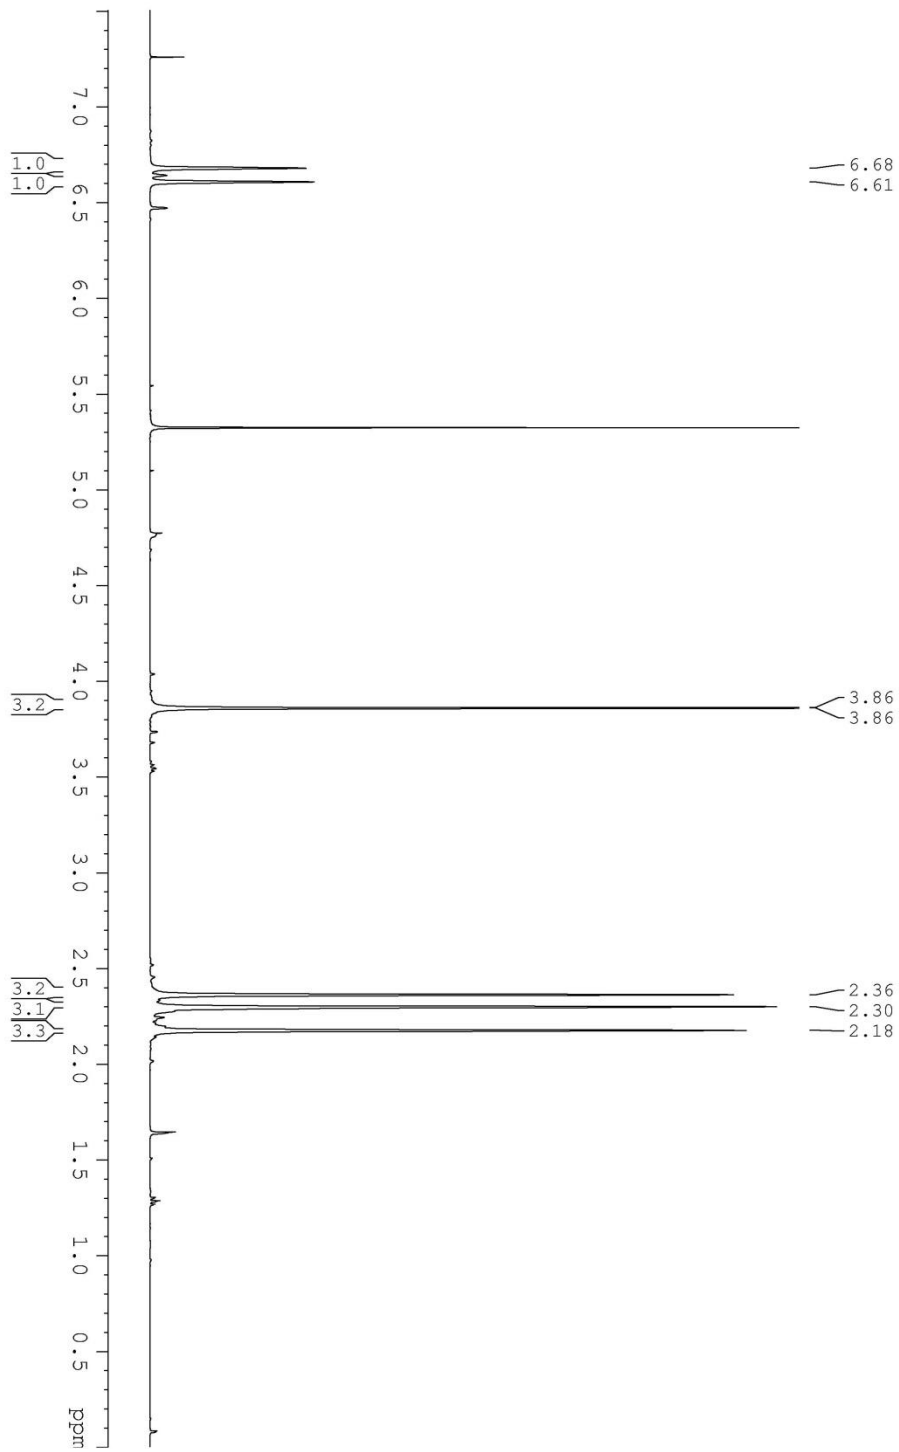

**Figure 1:**  $^1\text{H}$  NMR of 2,3,5-trimethylanisole ( $\text{CDCl}_3$ , 400 MHz).

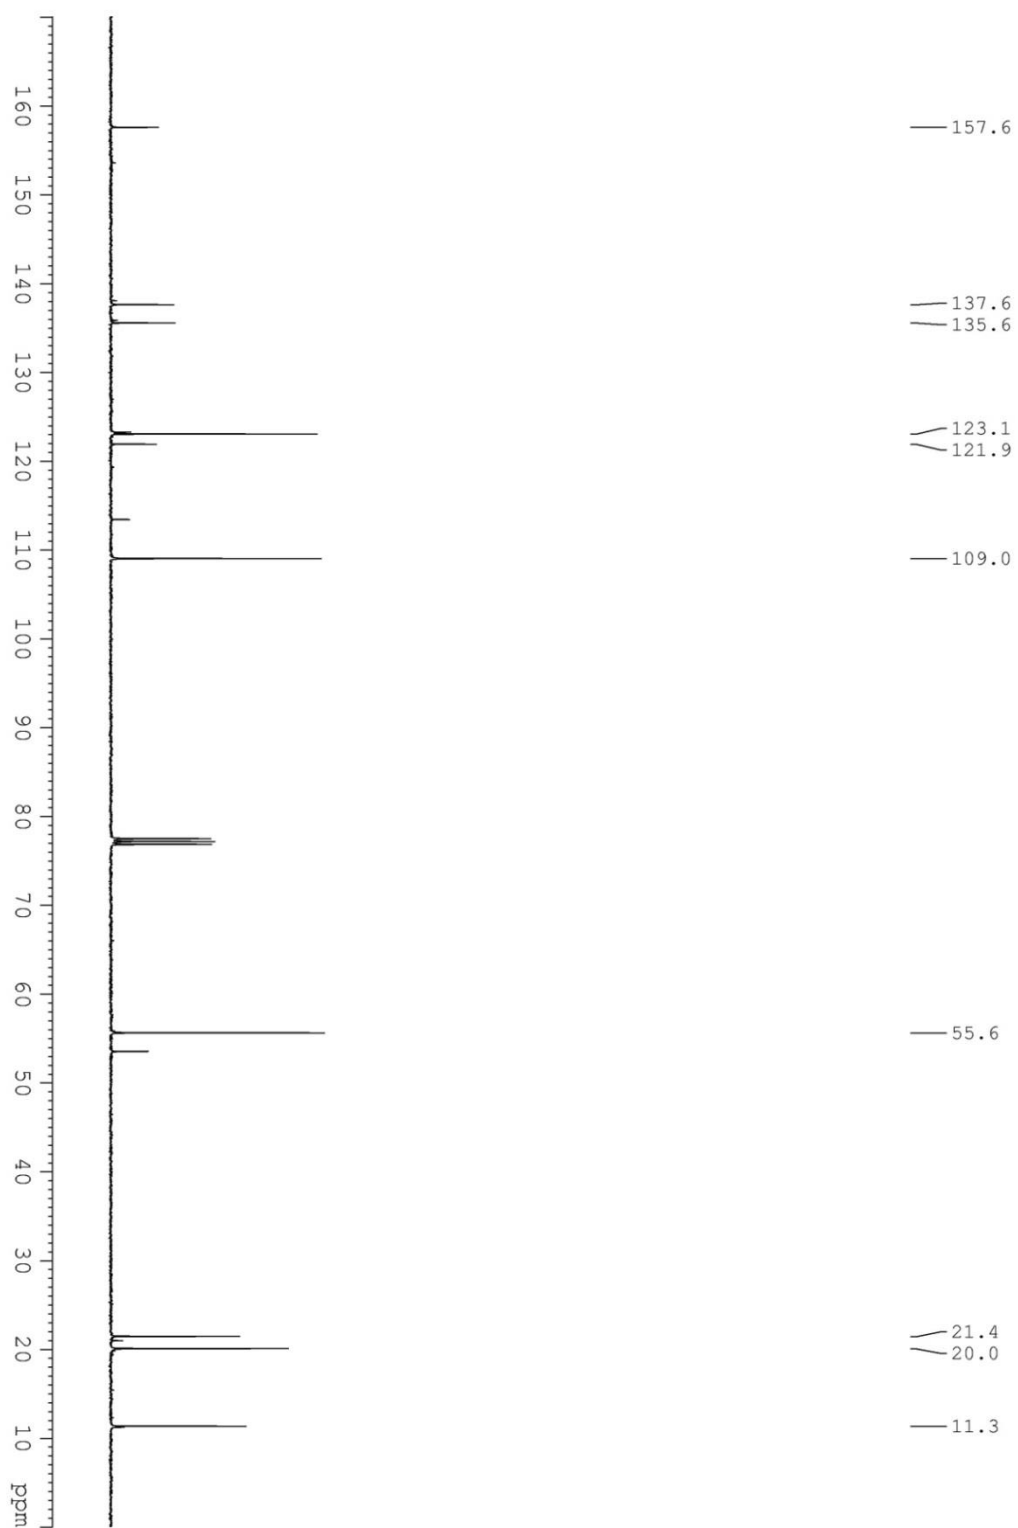

**Figure 2:**  $^{13}\text{C}$  NMR of 2,3,5-trimethylanisole ( $\text{CDCl}_3$ , 100 MHz).

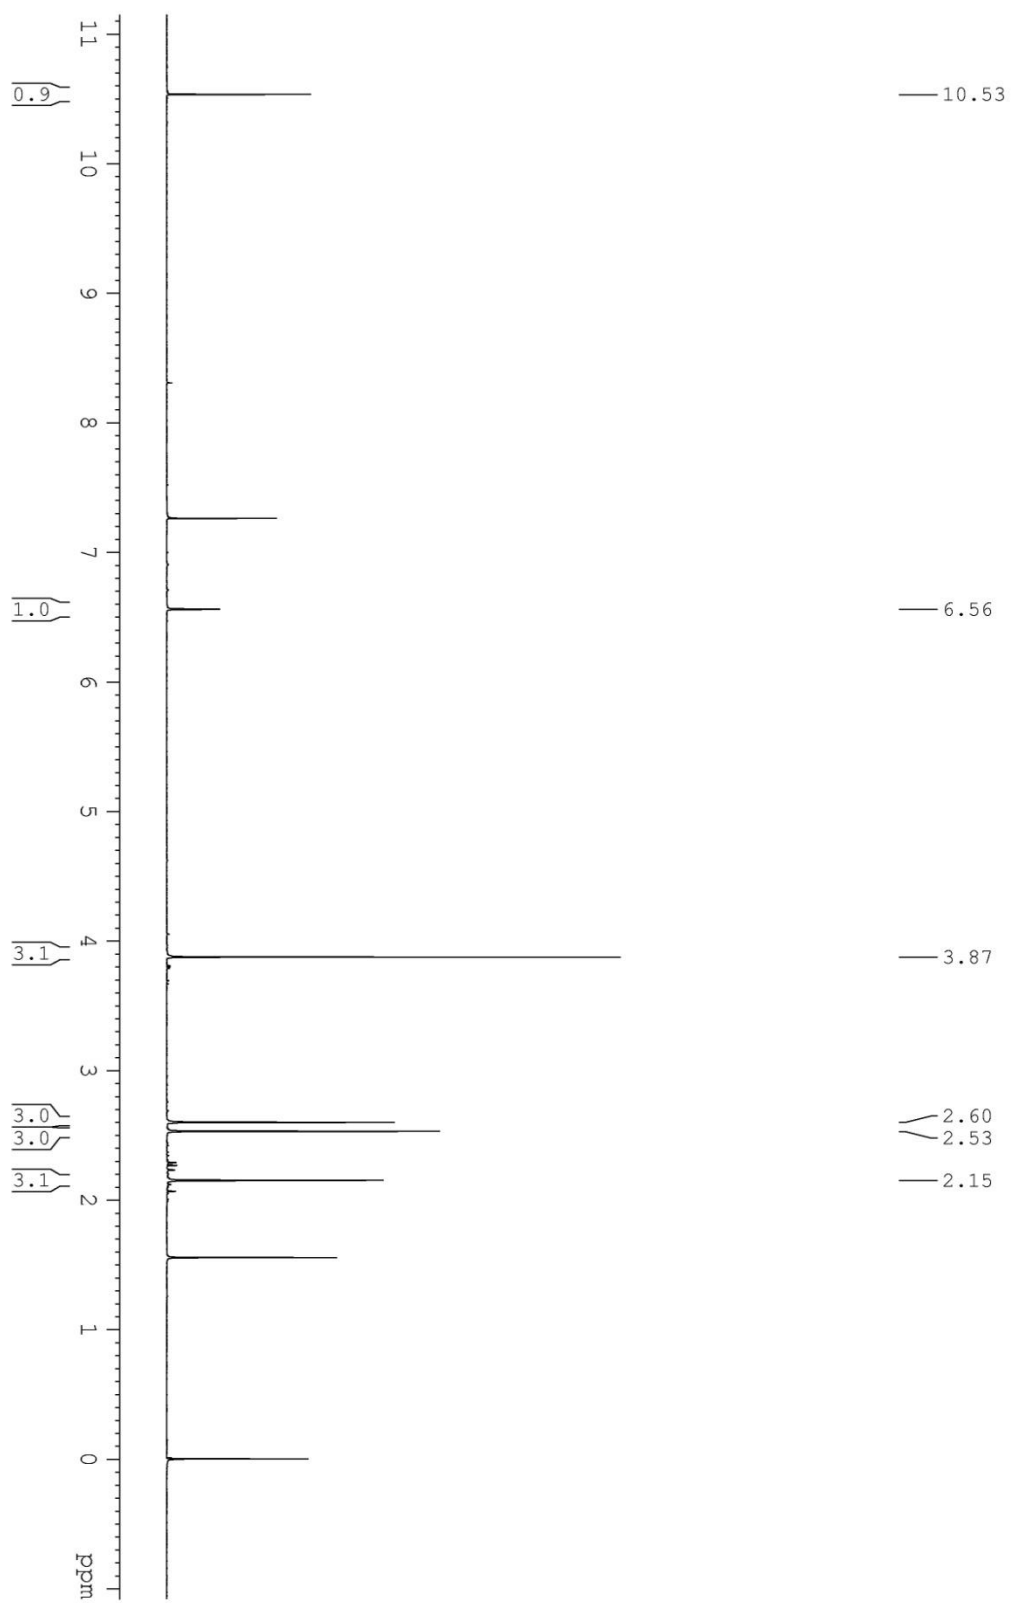

**Figure 3:**  $^1\text{H}$  NMR of **10** ( $\text{CDCl}_3$ , 400 MHz).

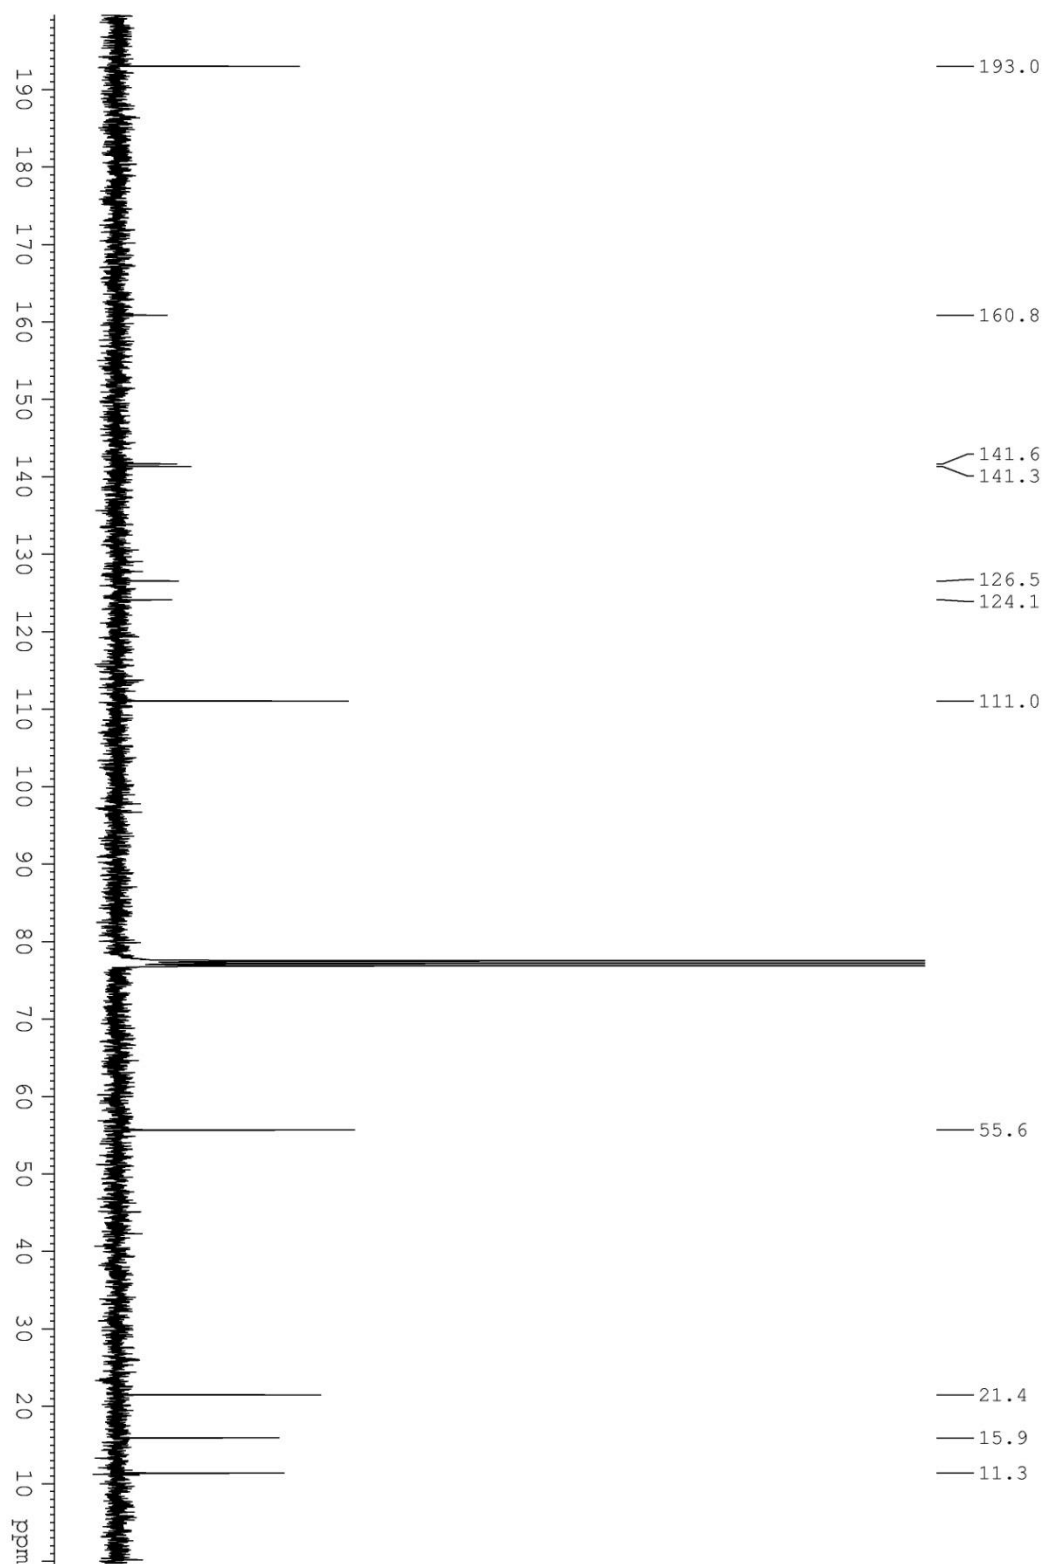

**Figure 4:**  $^{13}\text{C}$  NMR of **10** ( $\text{CDCl}_3$ , 100 MHz).

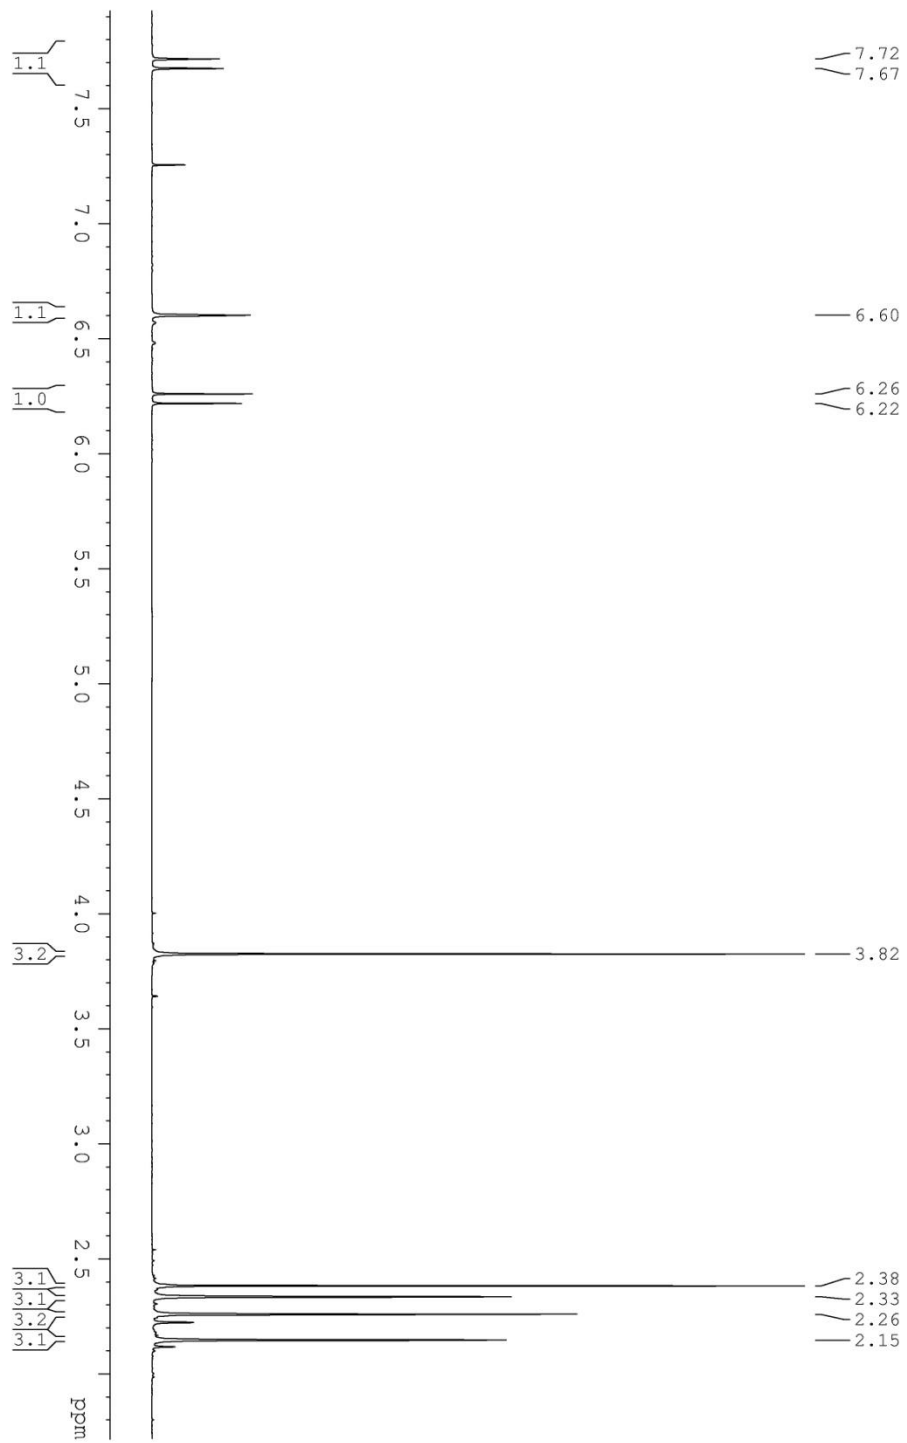

**Figure 5:**  $^1\text{H}$  NMR of **12** ( $\text{CDCl}_3$ , 400 MHz).

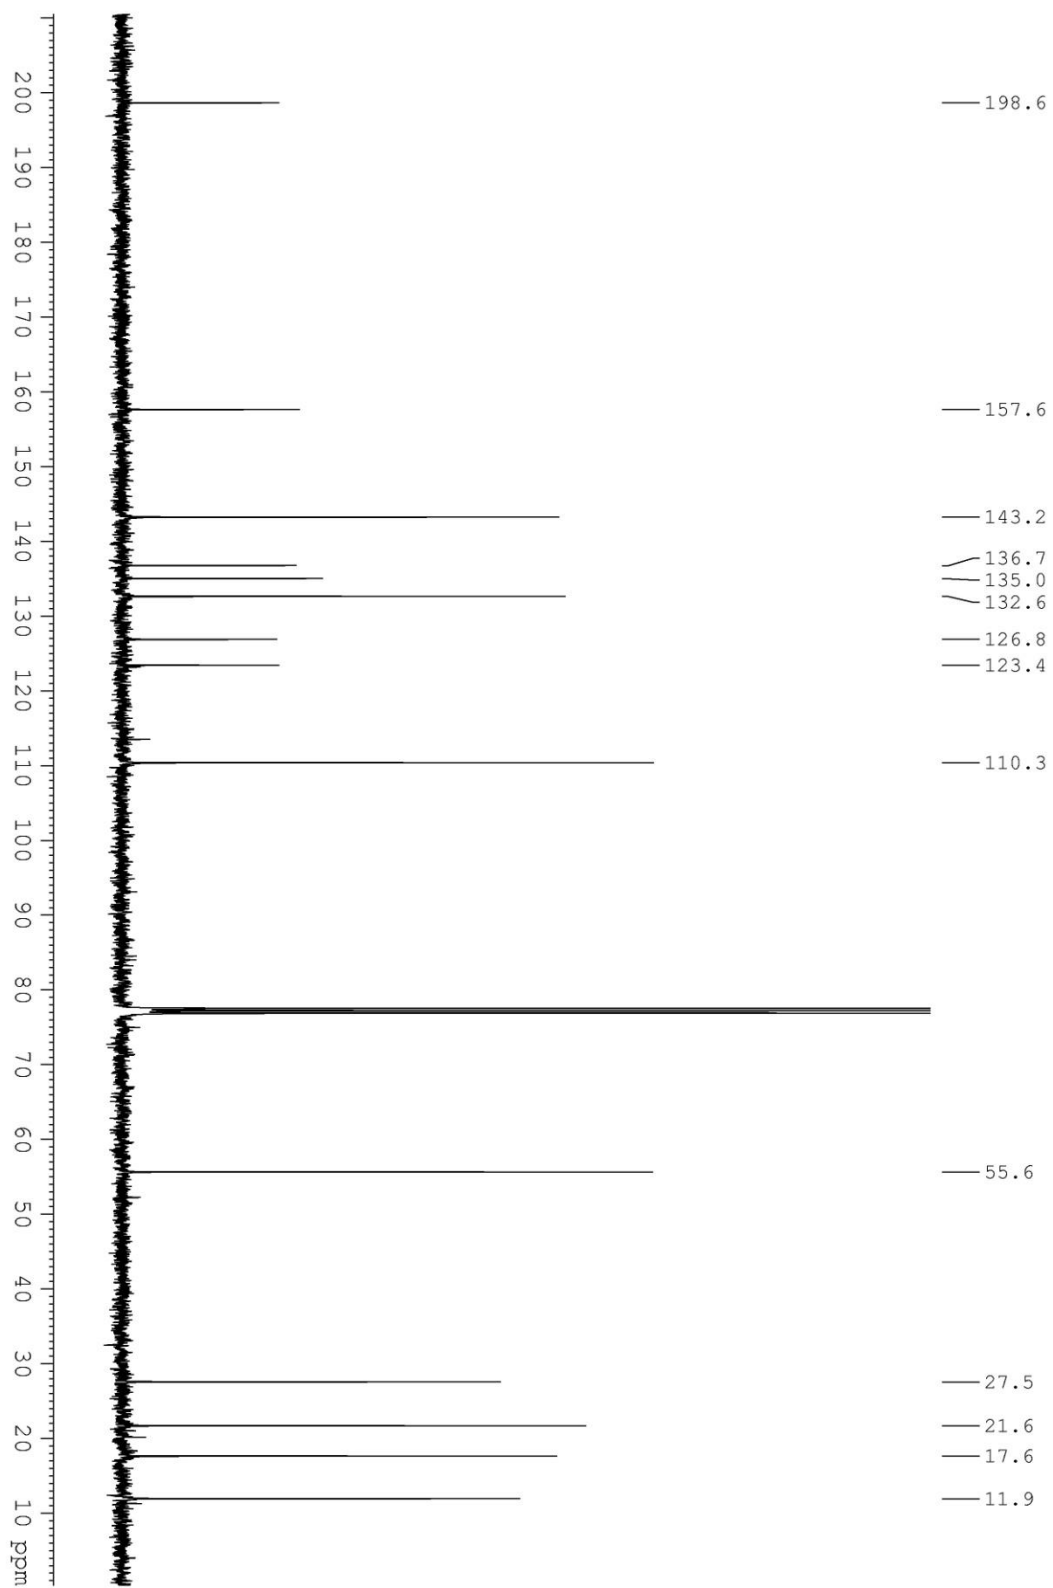

Figure 6:  $^{13}\text{C}$  NMR of 12 ( $\text{CDCl}_3$ , 400 MHz).



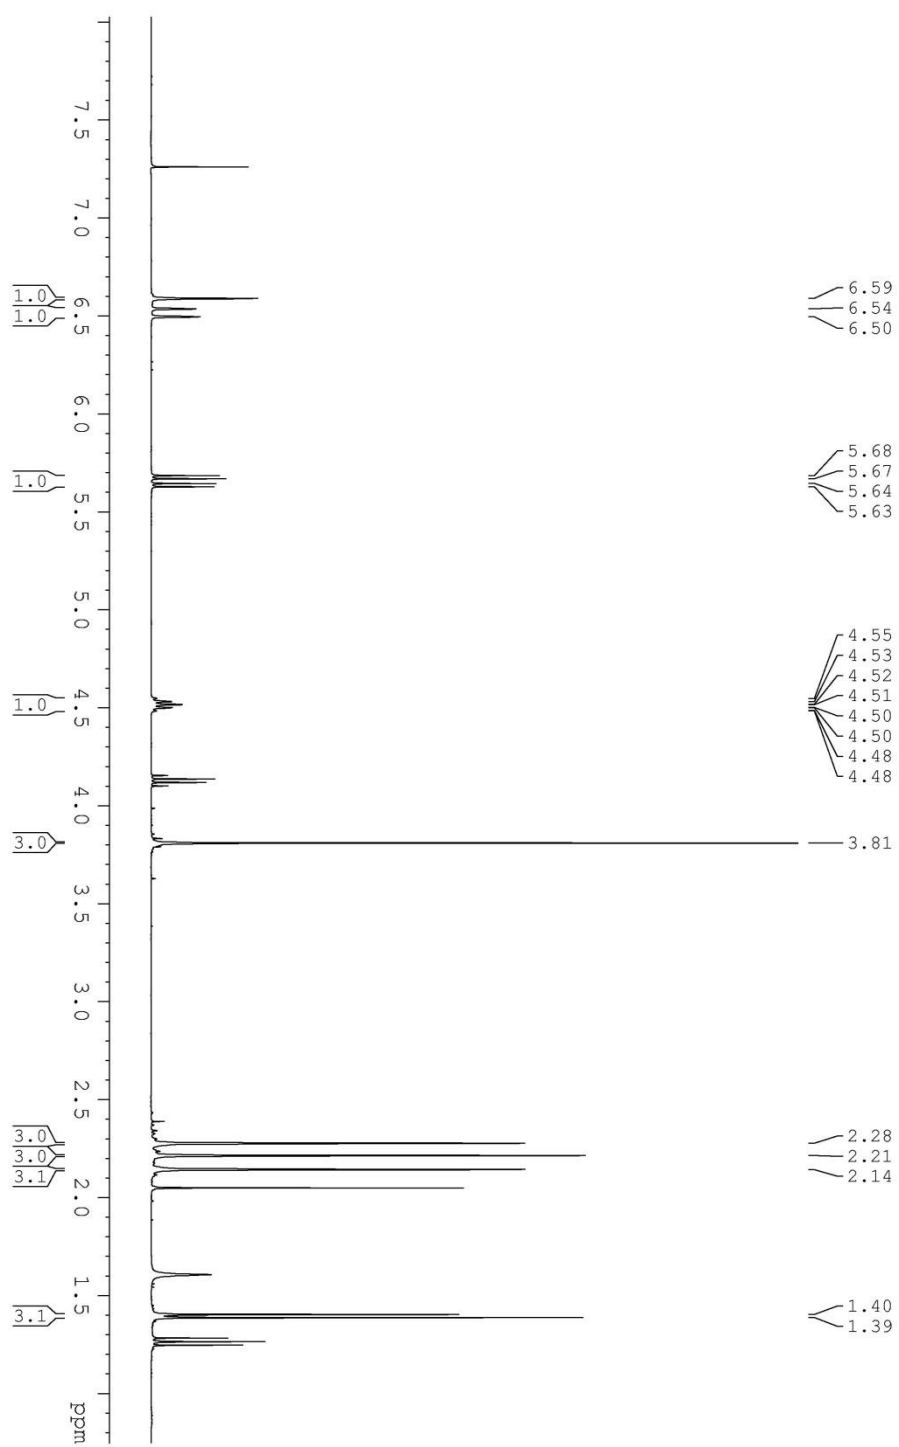

**Figure 7:**  $^1\text{H}$  NMR of 14 ( $\text{CDCl}_3$ , 400 MHz).

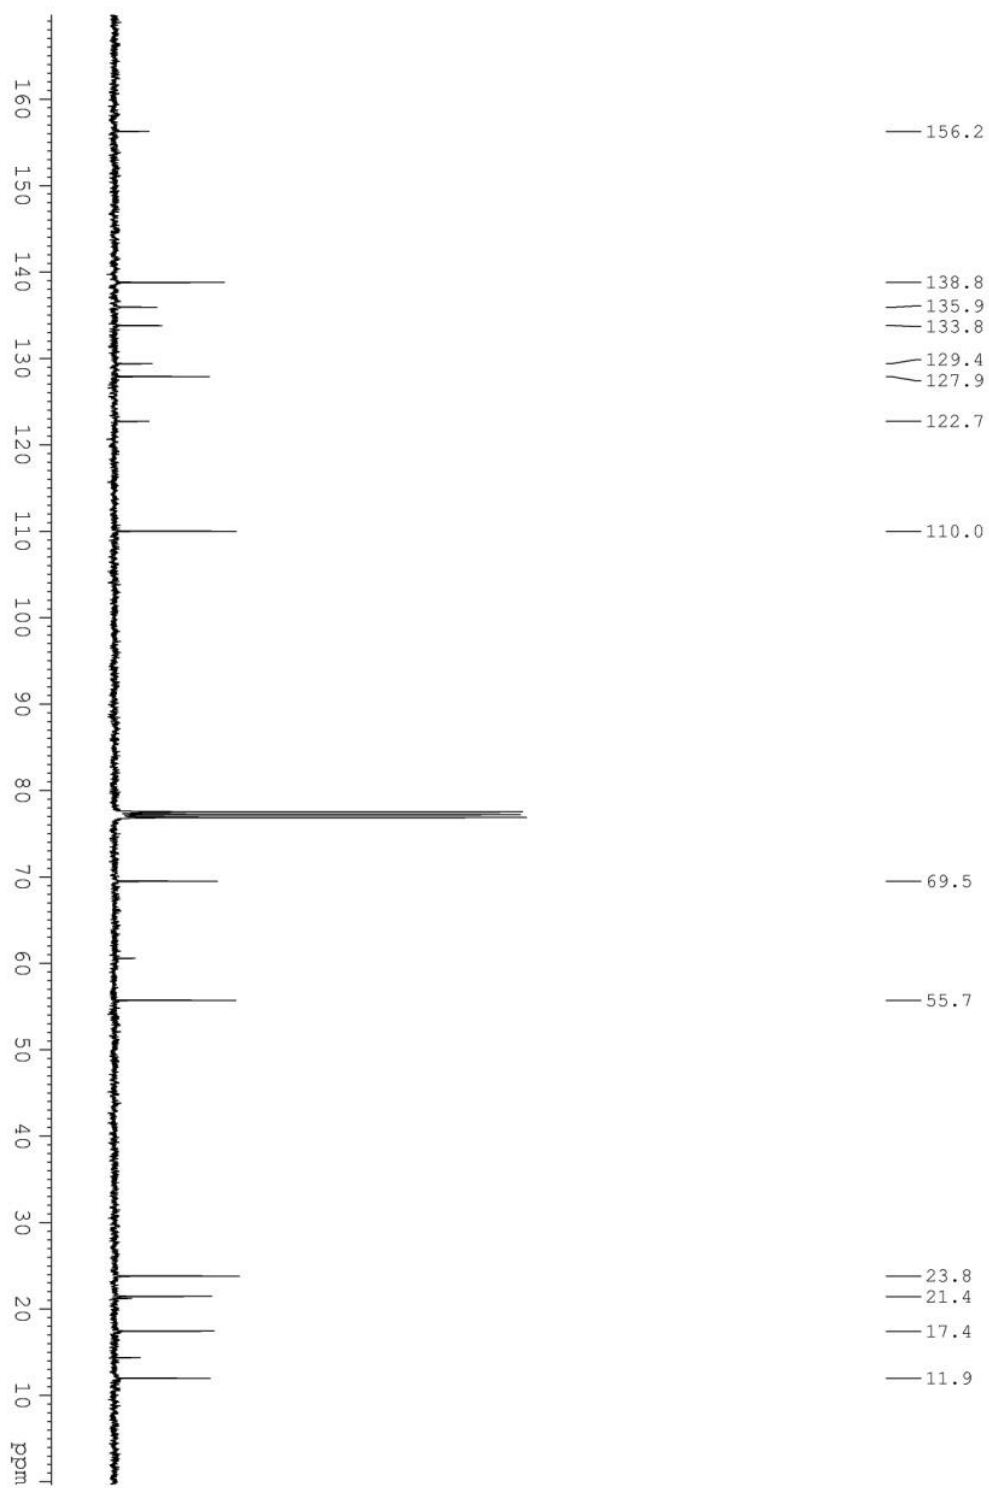

**Figure 8:**  $^{13}\text{C}$  NMR of **14** ( $\text{CDCl}_3$ , 100 MHz).

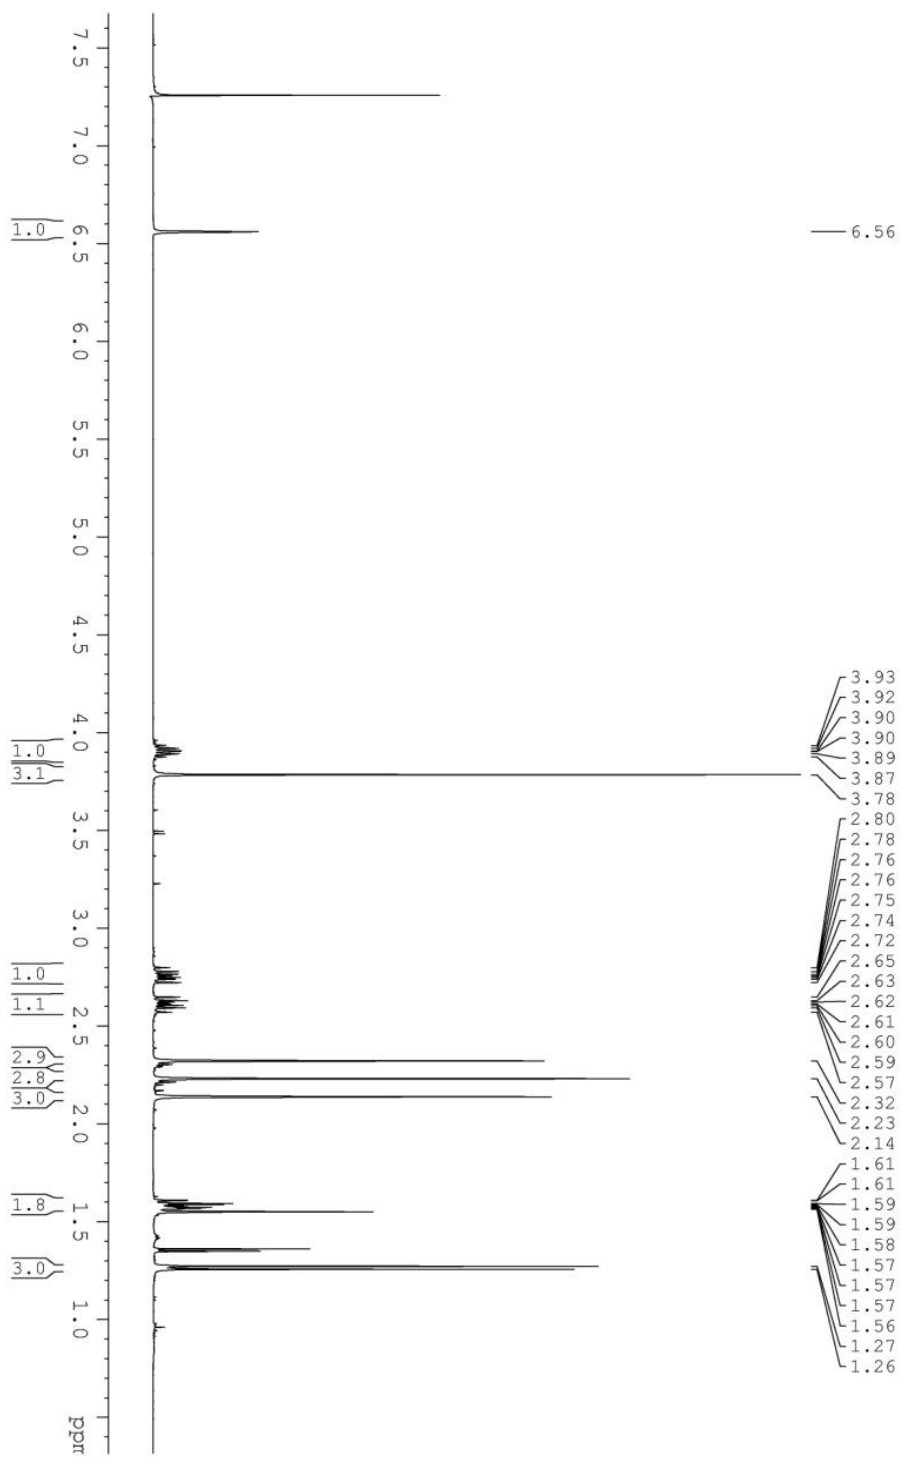

**Figure 9:**  $^1\text{H}$  NMR of **15** ( $\text{CDCl}_3$ , 400 MHz).

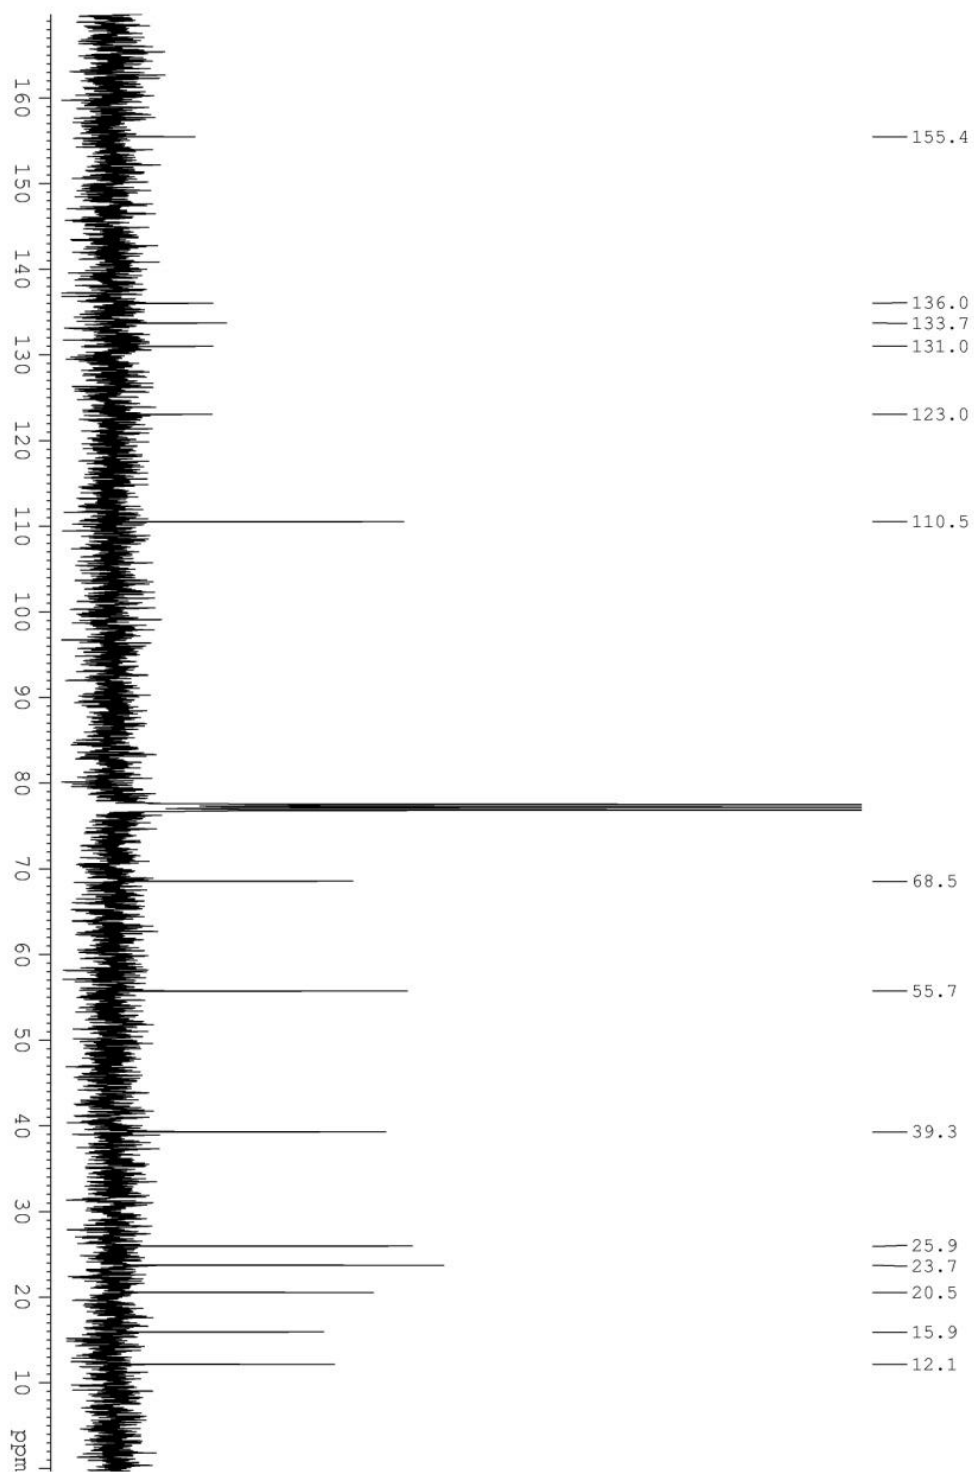

**Figure 10:**  $^{13}\text{C}$  NMR of 15 ( $\text{CDCl}_3$ , 100 MHz).

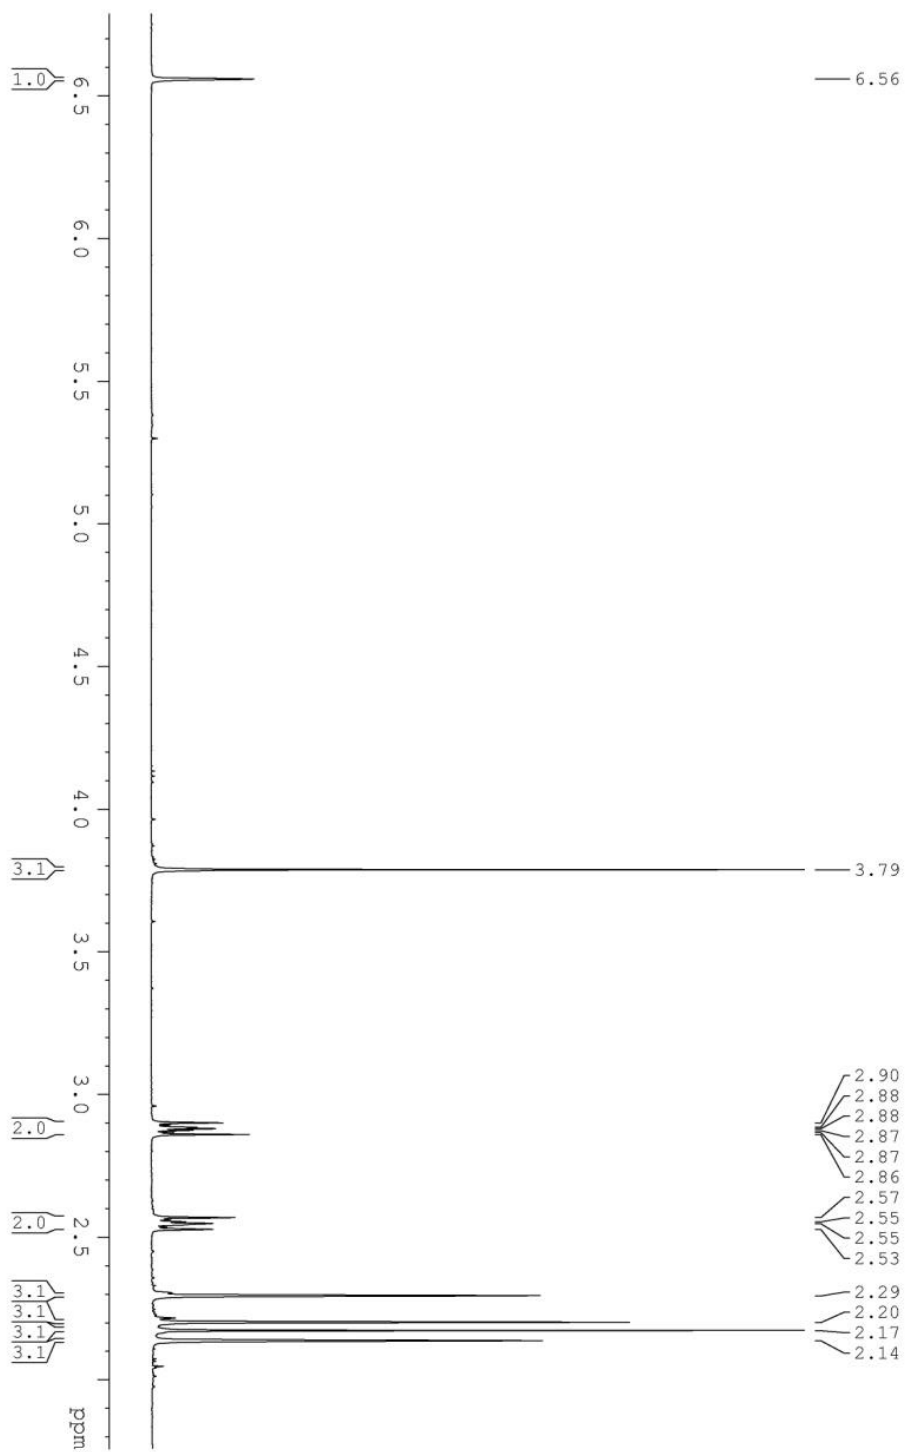

**Figure 11:** <sup>1</sup>H NMR of **13** (CDCl<sub>3</sub>, 400 MHz).

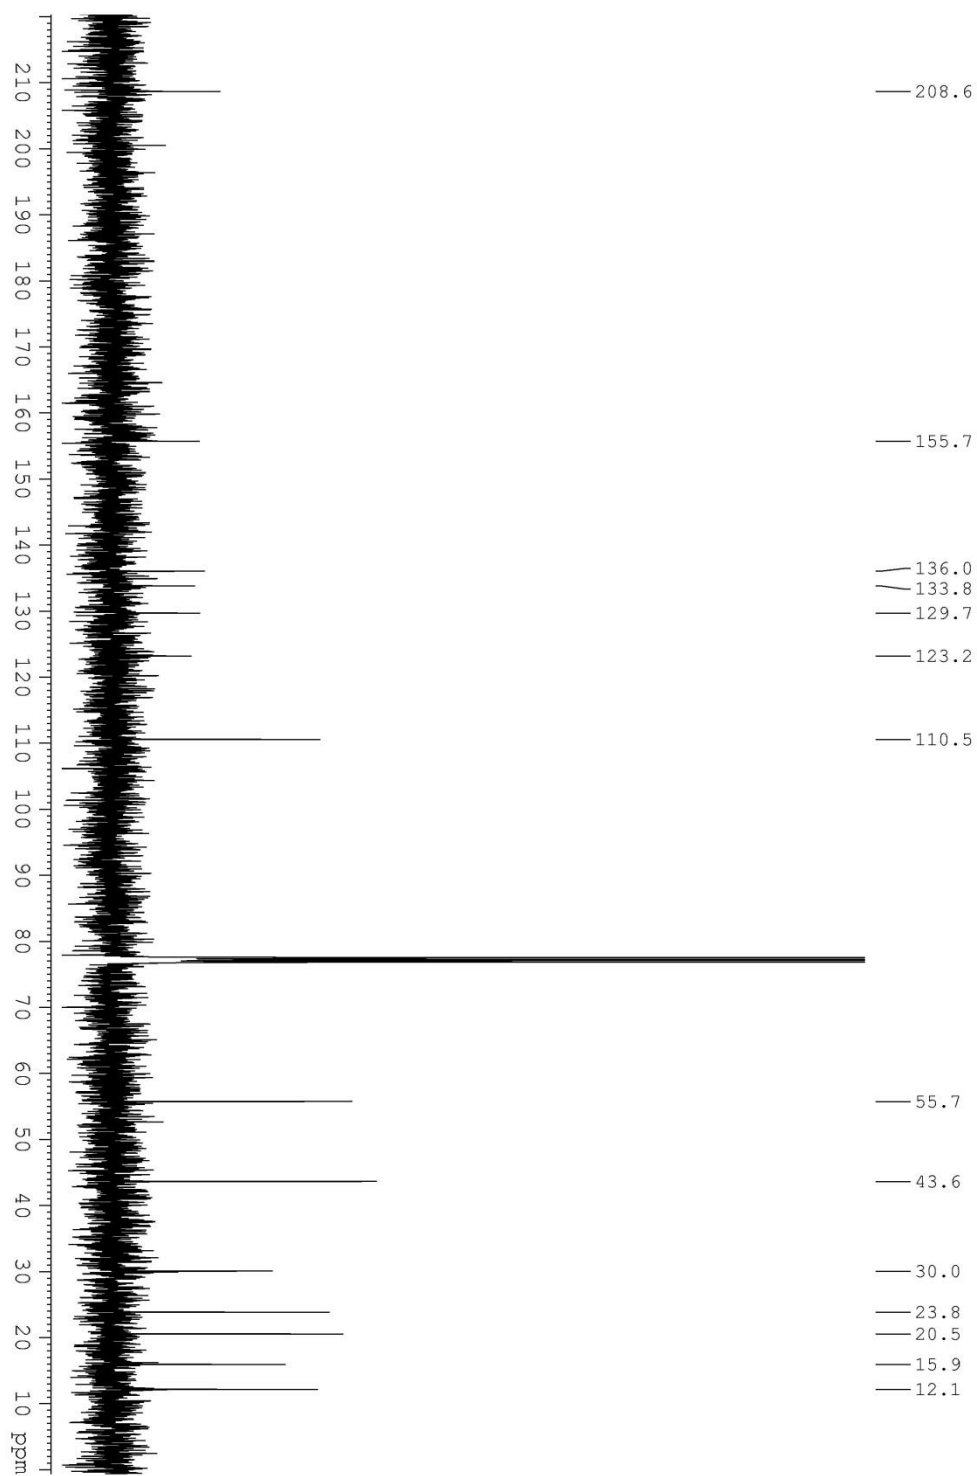

**Figure 12:**  $^{13}\text{C}$  NMR of 13 ( $\text{CDCl}_3$ , 100 MHz).

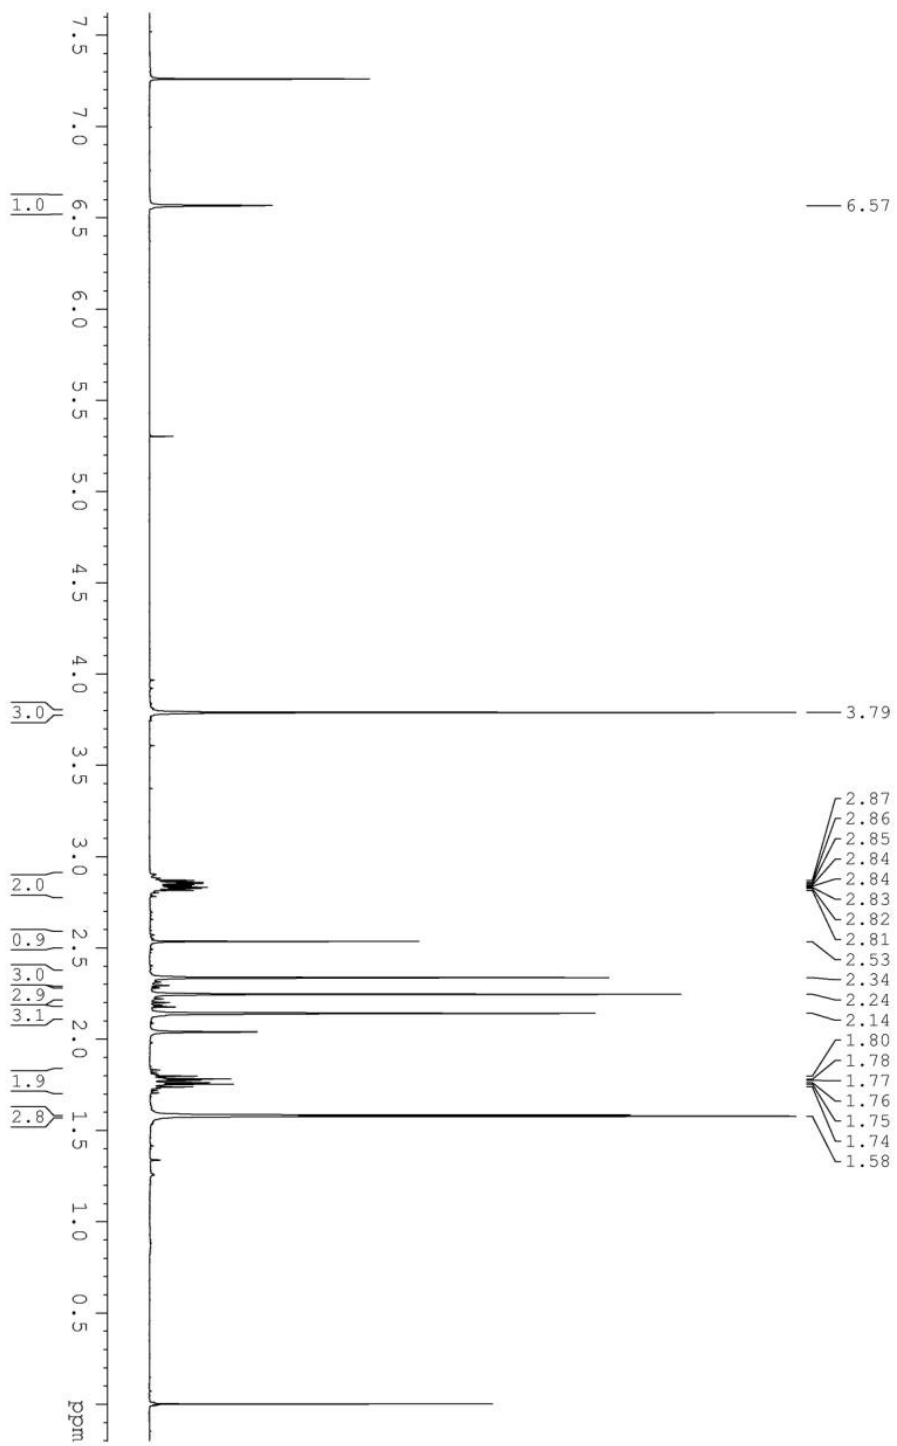

Figure 13:  $^1\text{H}$  NMR of **9** ( $\text{CDCl}_3$ , 400 MHz).

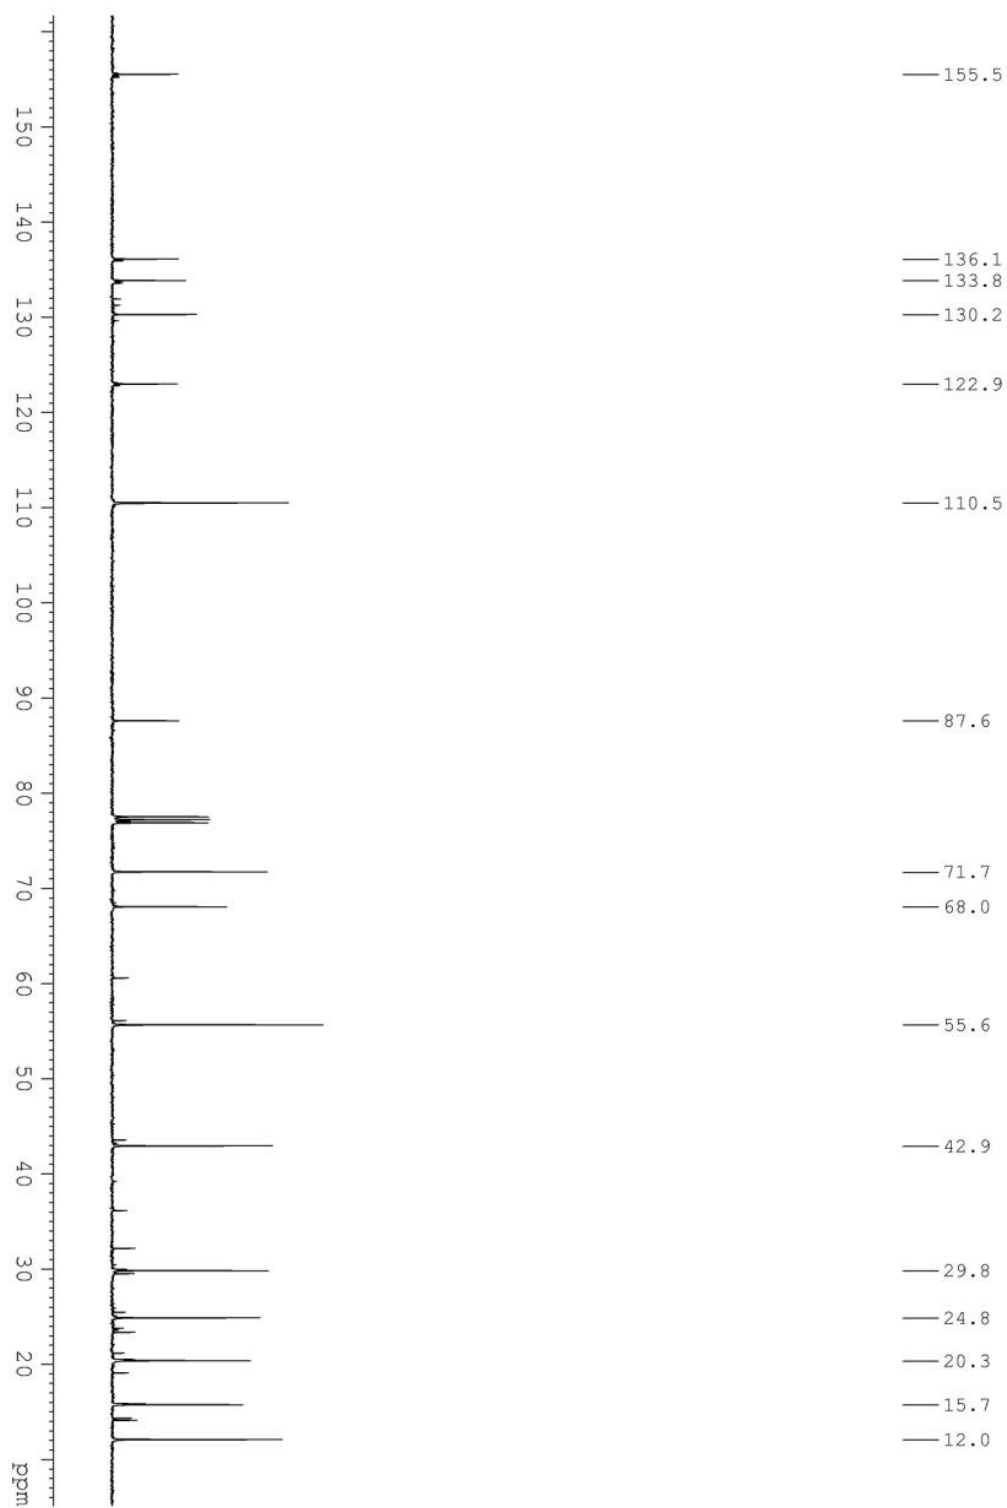

**Figure 14:**  $^{13}\text{C}$  NMR of **9** ( $\text{CDCl}_3$ , 100 MHz).



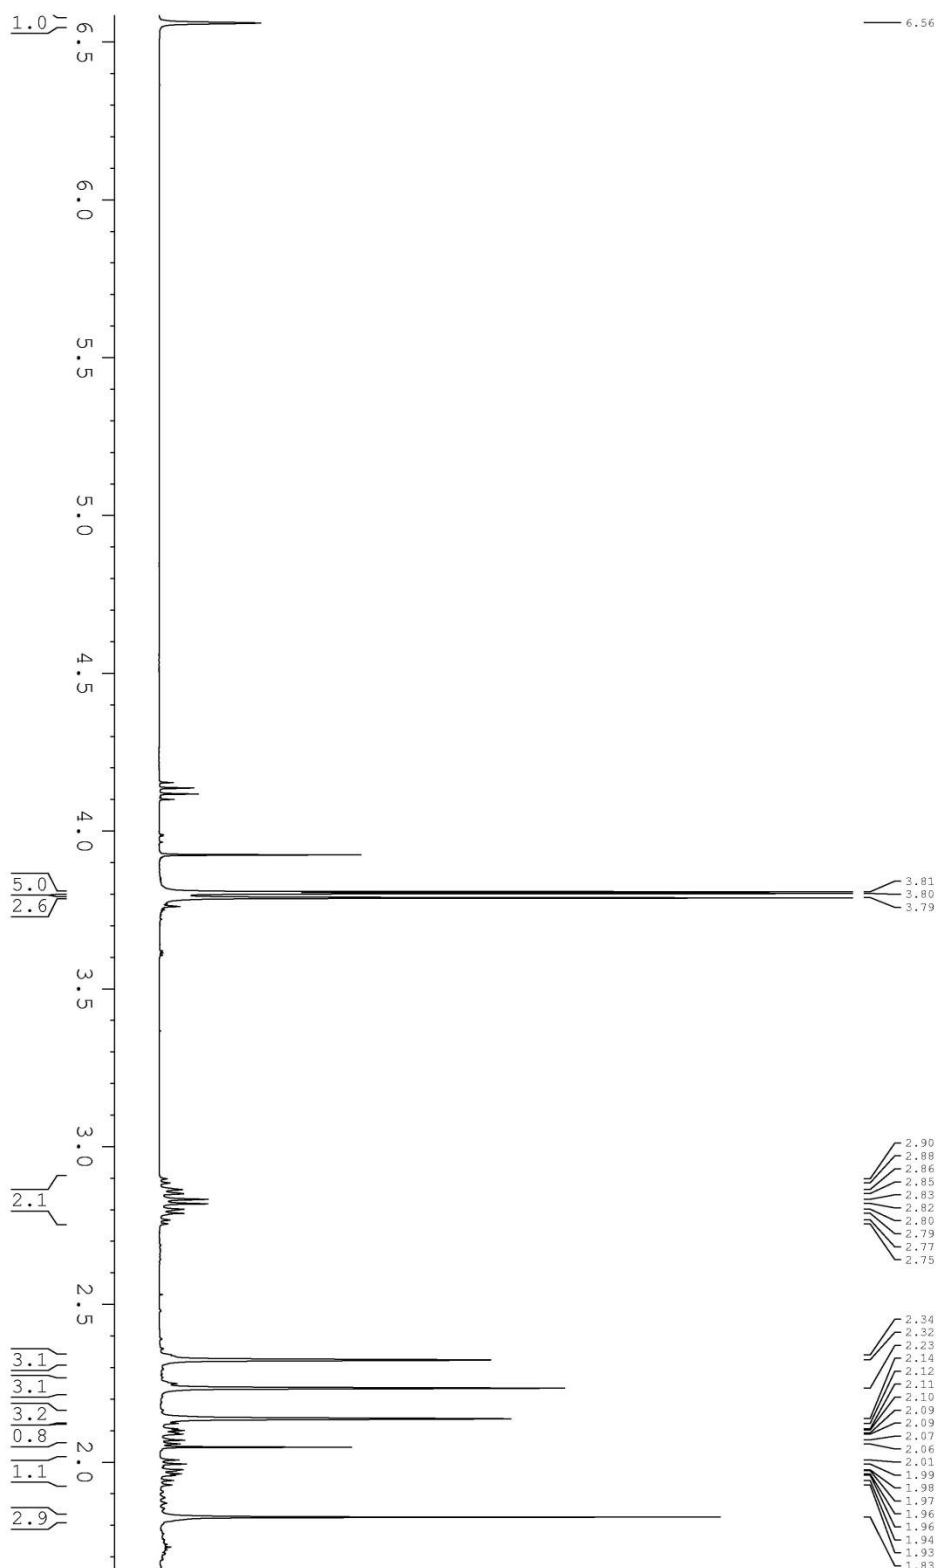

**Figure 15:**  $^1\text{H}$  NMR of **19** ( $\text{CDCl}_3$ , 400 MHz).

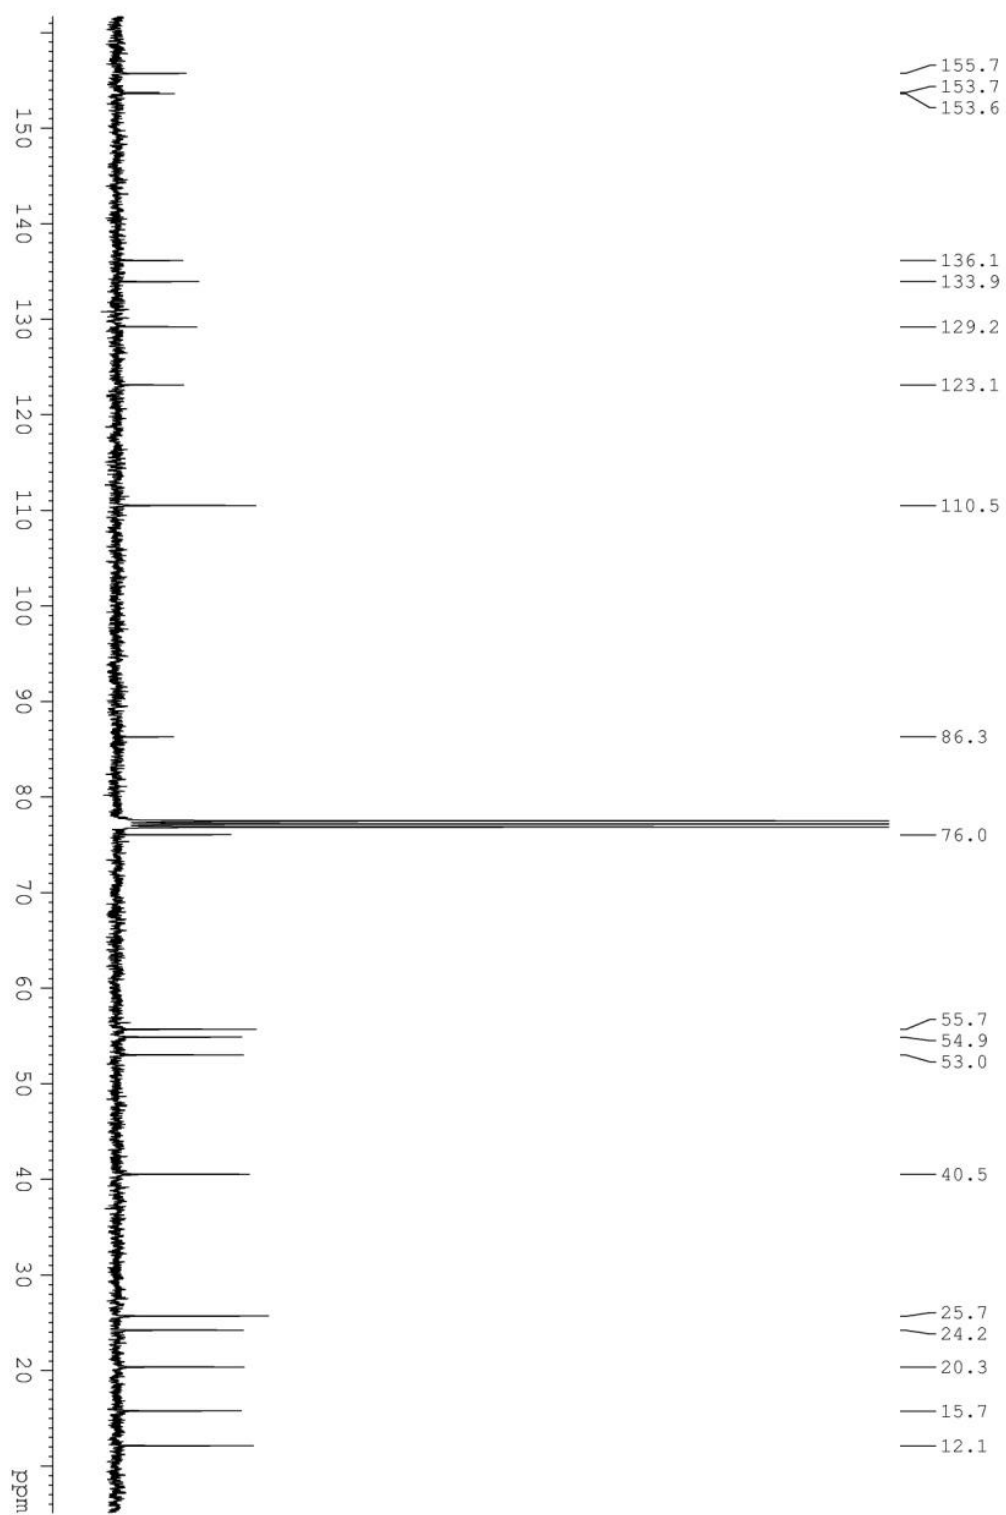

**Figure 16:**  $^{13}\text{C}$  NMR of 19 ( $\text{CDCl}_3$ , 100 MHz).

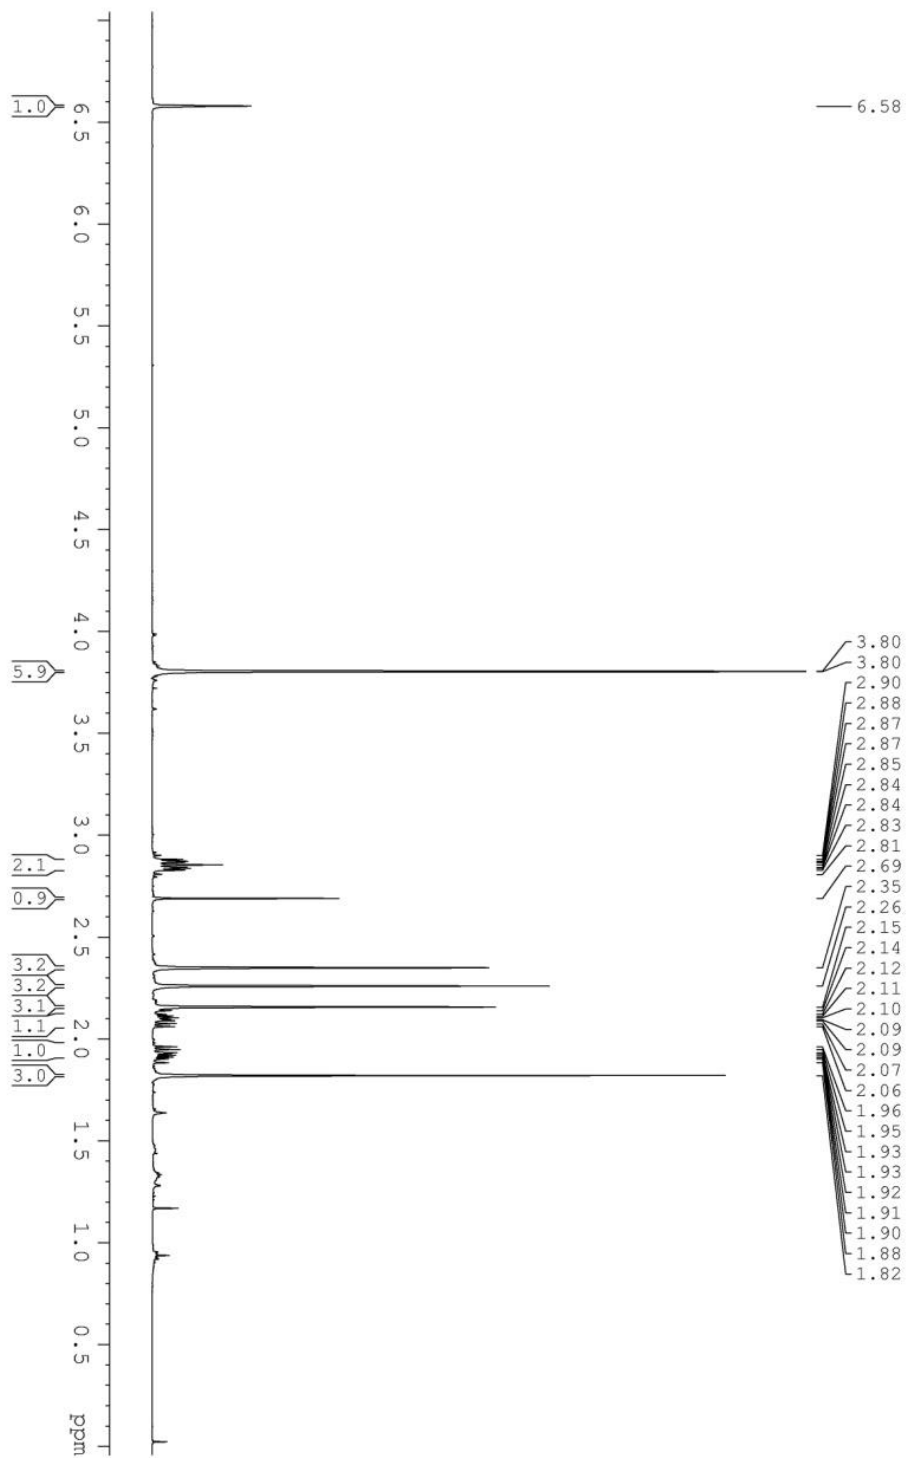

Figure 17: <sup>1</sup>H NMR of **18** (CDCl<sub>3</sub>, 400 MHz).

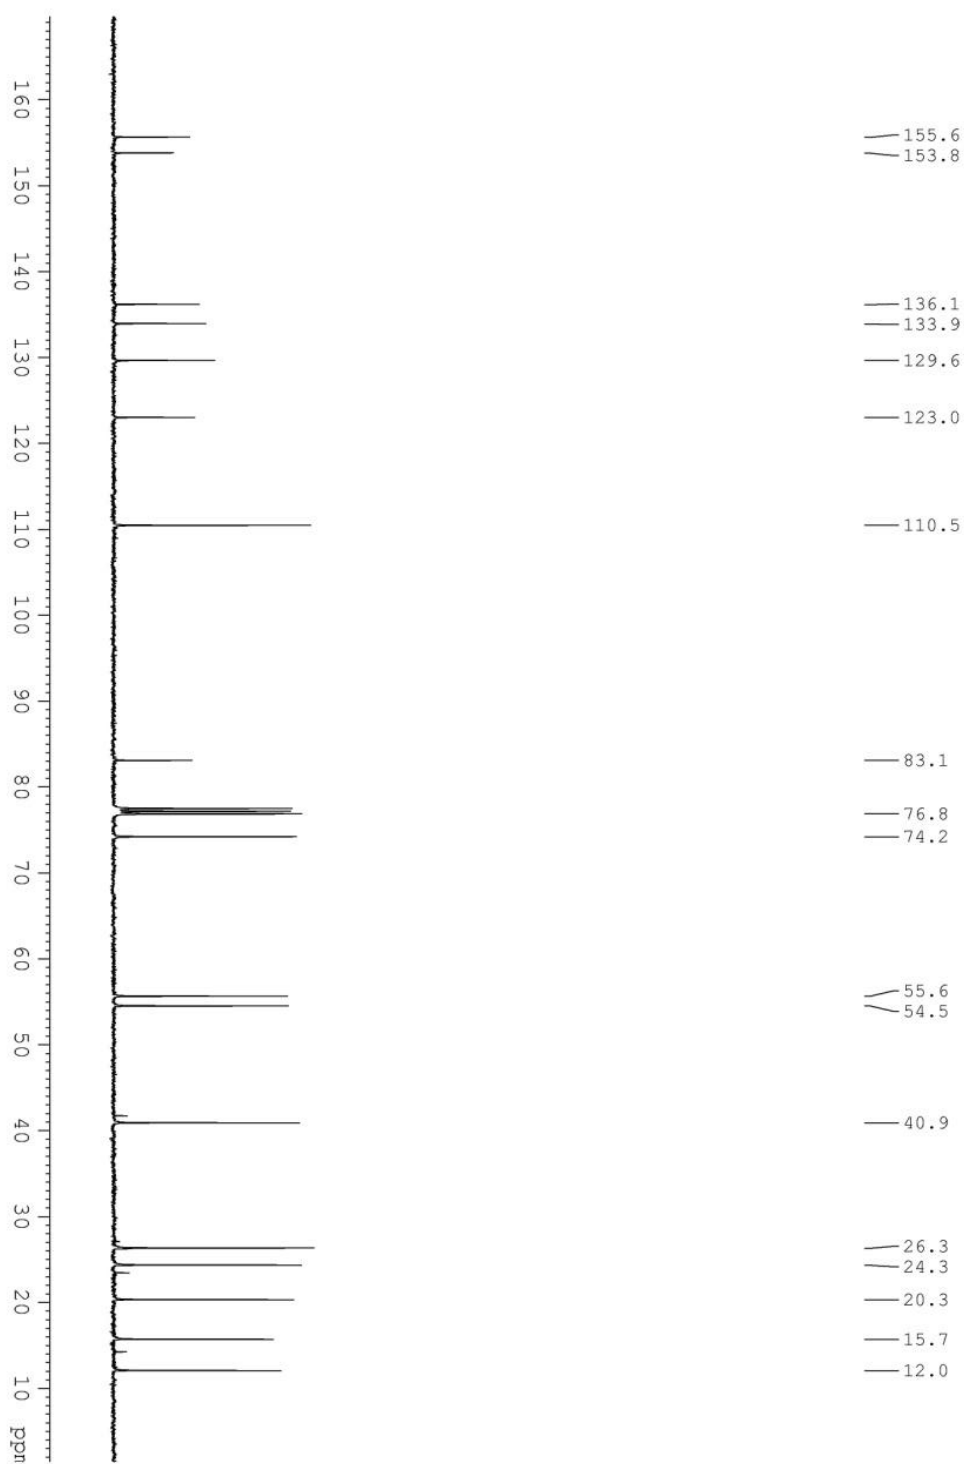

**Figure 18:**  $^{13}\text{C}$  NMR of **18** ( $\text{CDCl}_3$ , 100 MHz).

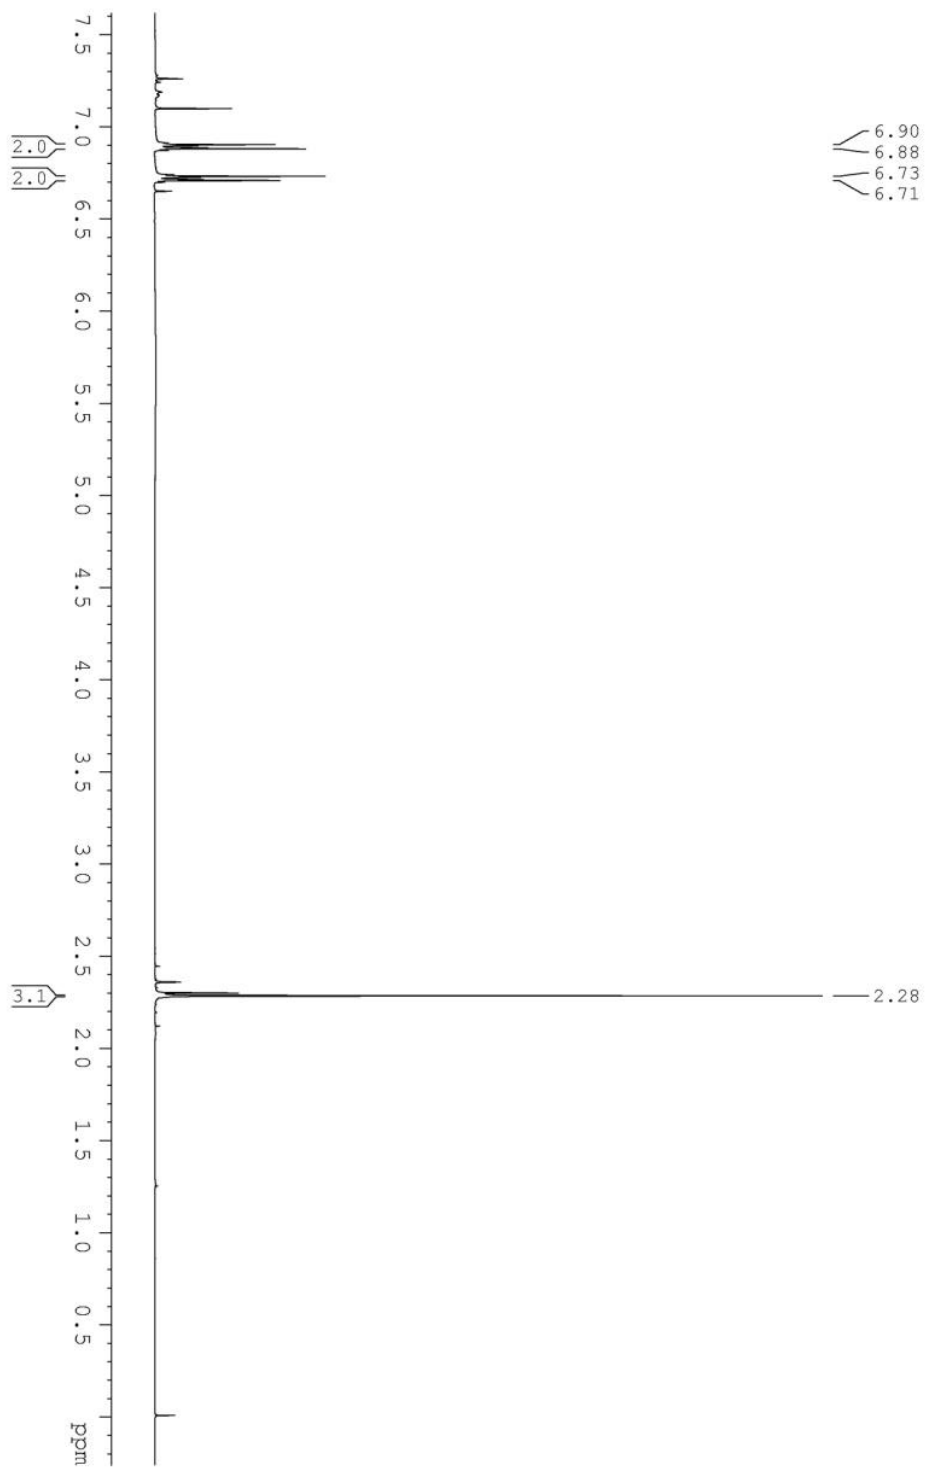

Figure 19:  $^1\text{H}$  NMR of 16 ( $\text{CDCl}_3$ , 400 MHz).

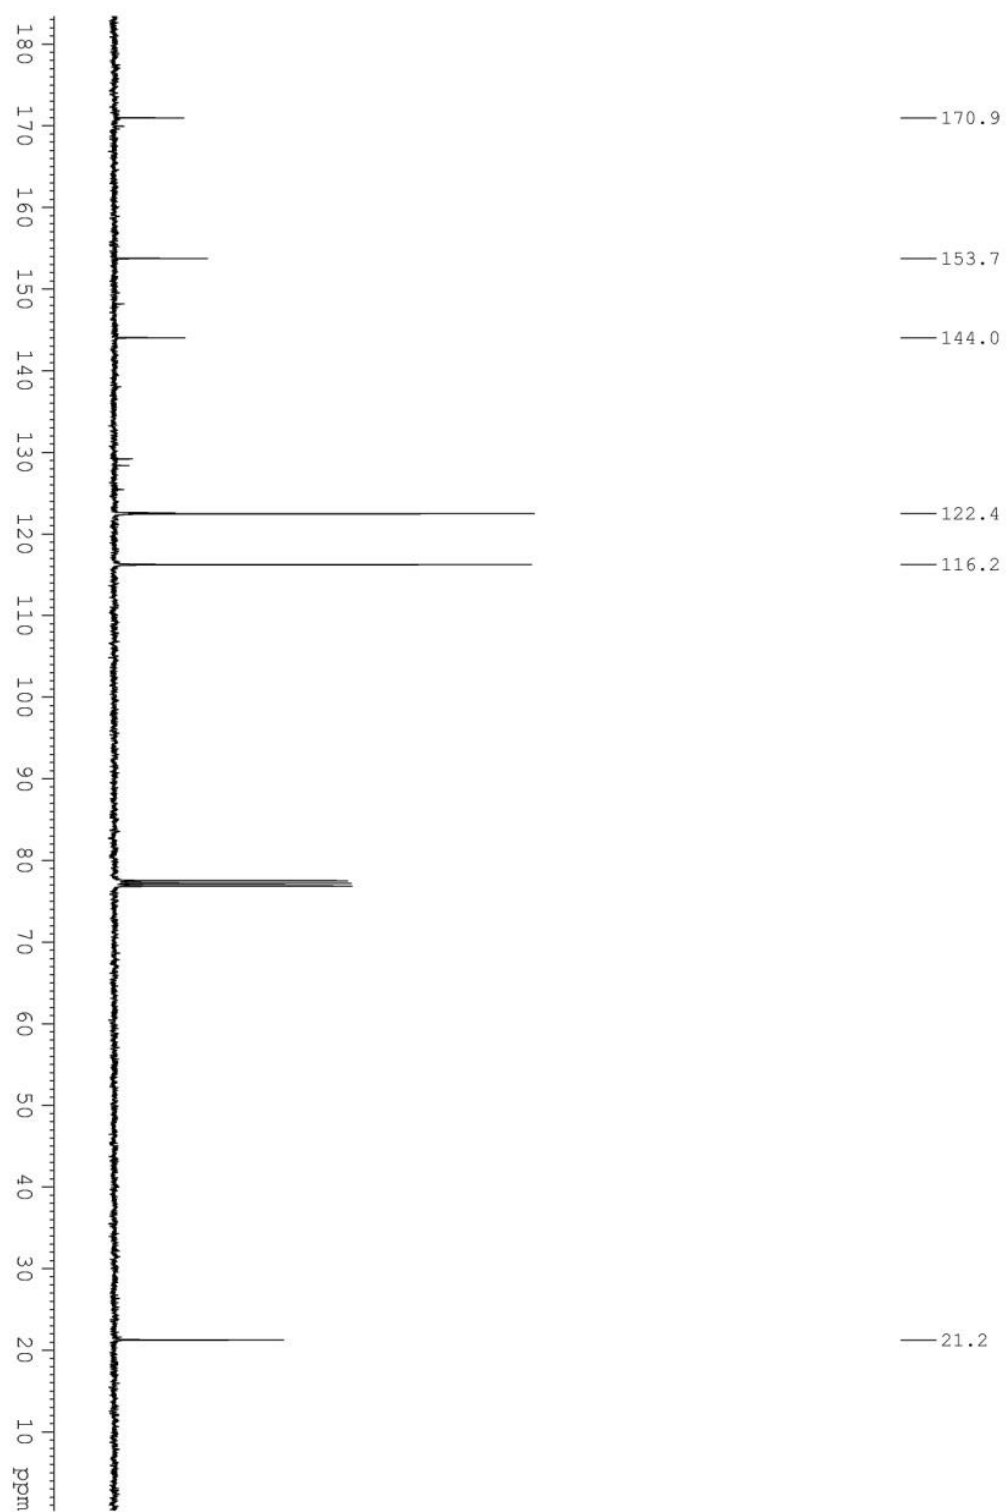

**Figure 20:**  $^{13}\text{C}$  NMR of **16** ( $\text{CDCl}_3$ , 100 MHz).

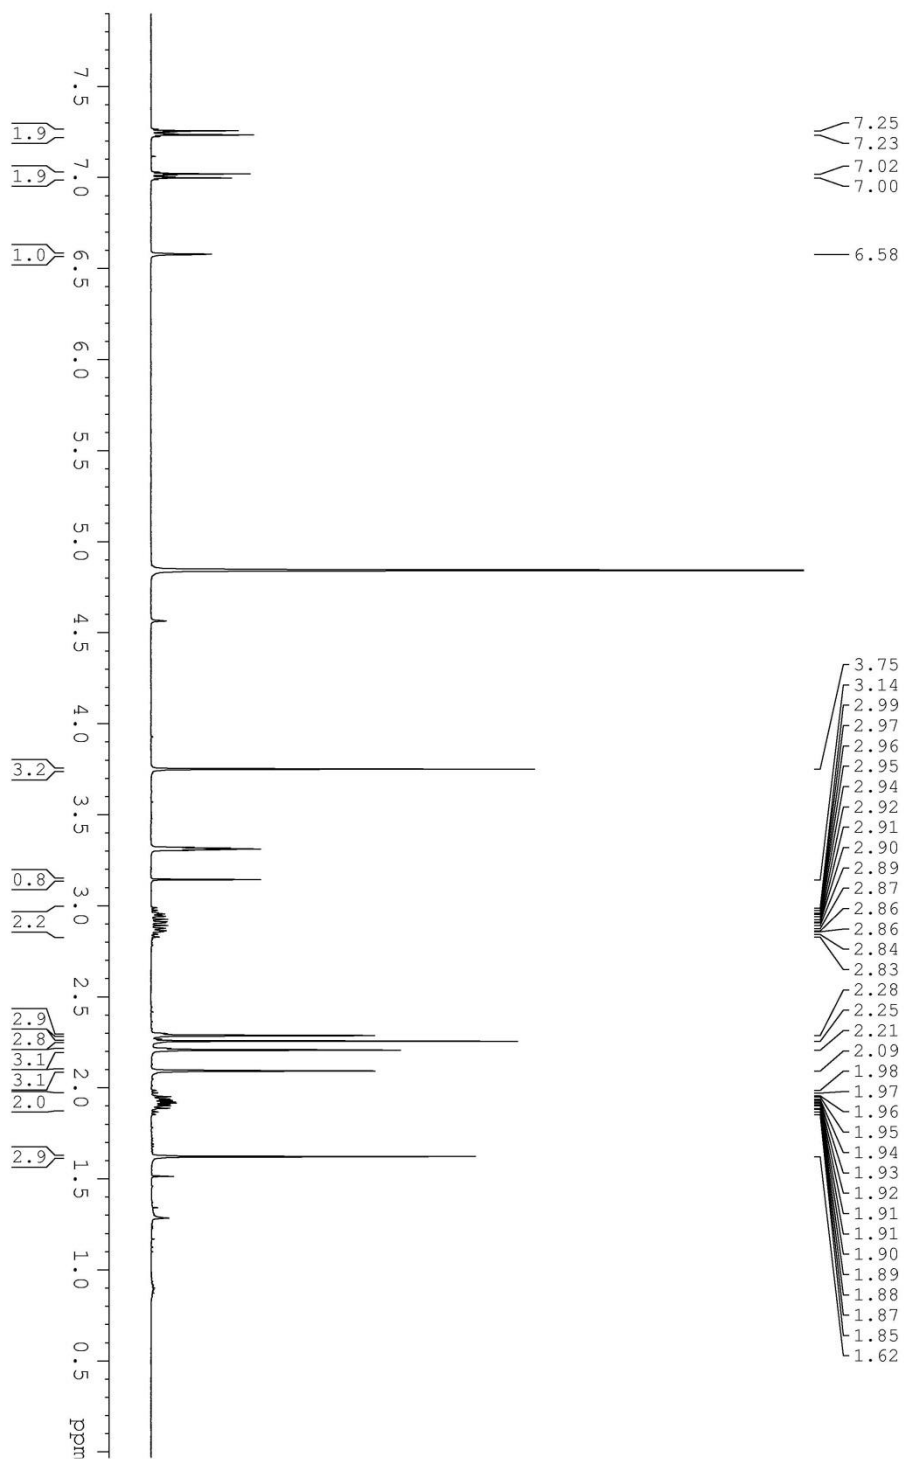

**Figure 21:**  $^1\text{H}$  NMR of **8** ( $\text{CD}_3\text{OD}$ , 100 MHz).

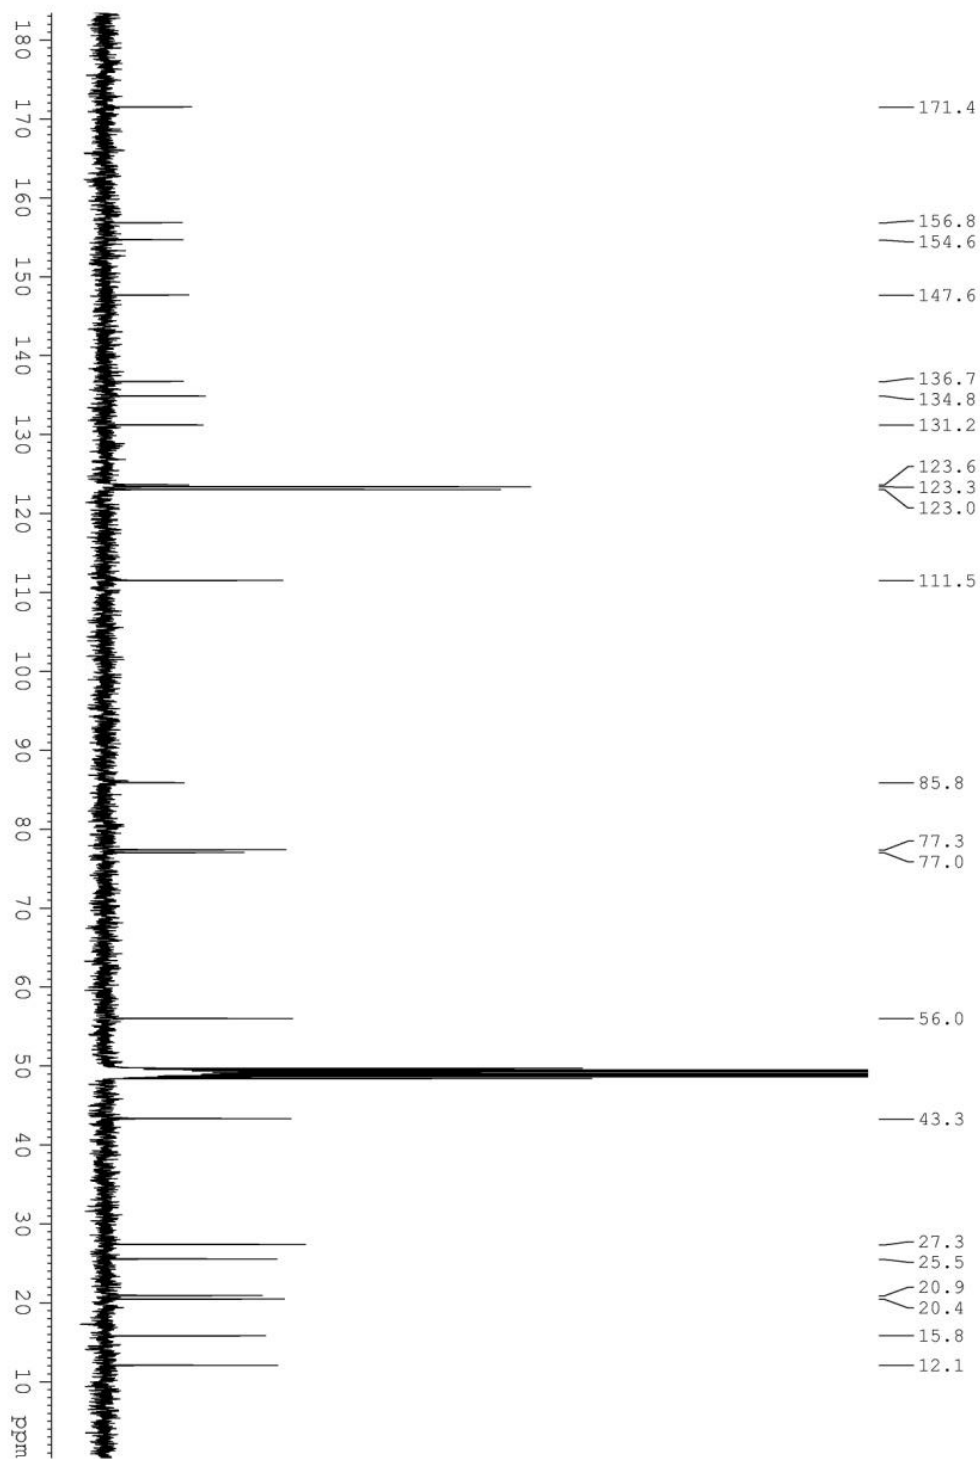

**Figure 22:**  $^{13}\text{C}$  NMR of **8** ( $\text{CD}_3\text{OD}$ , 100 MHz).



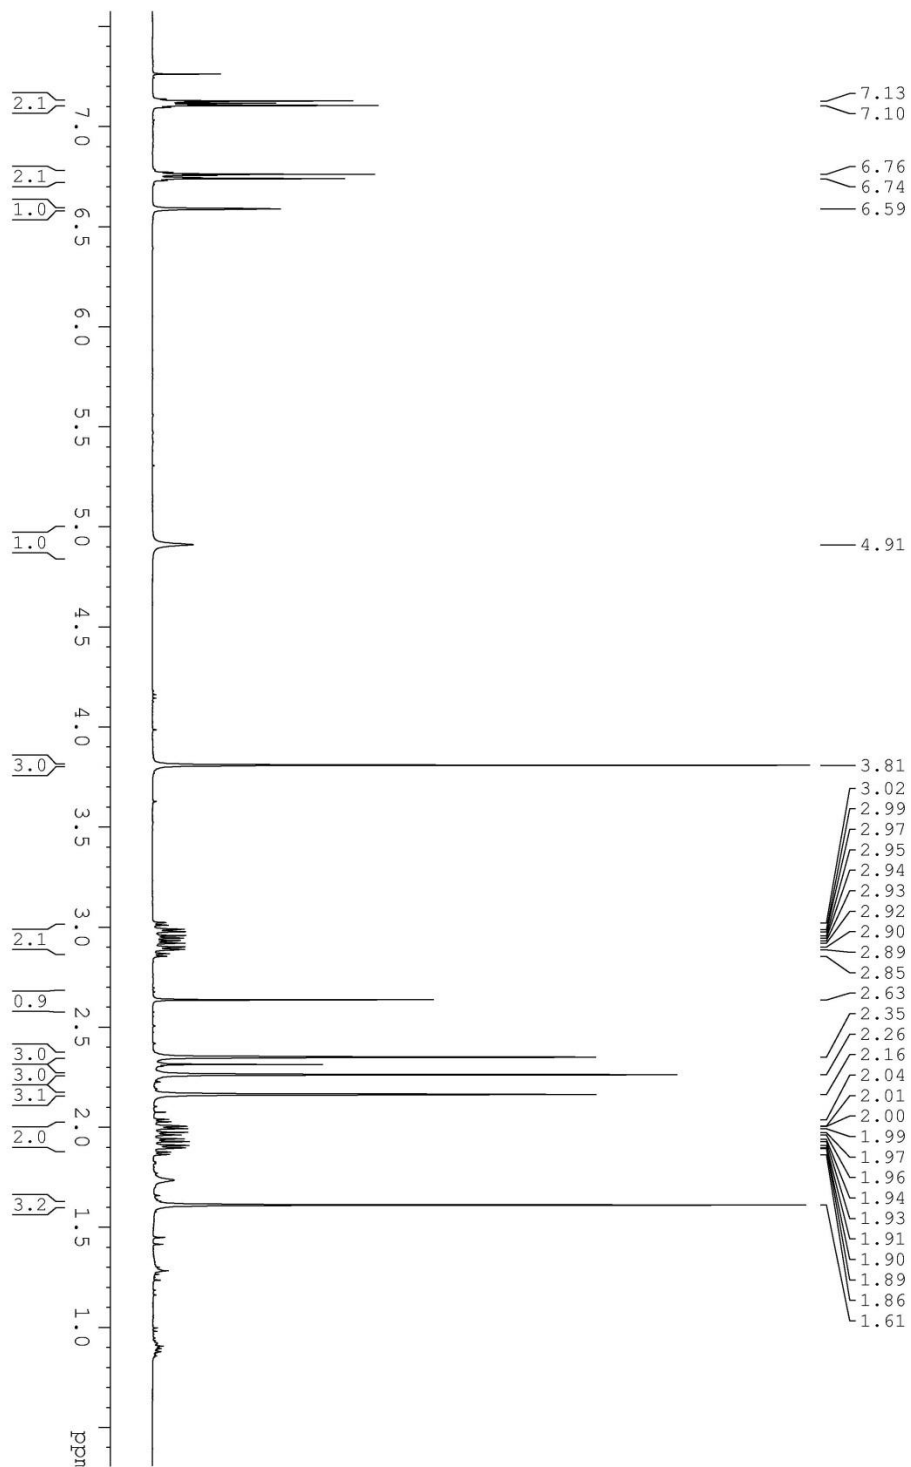

Figure 23:  $^1\text{H}$  NMR of **20** ( $\text{CDCl}_3$ , 400 MHz).

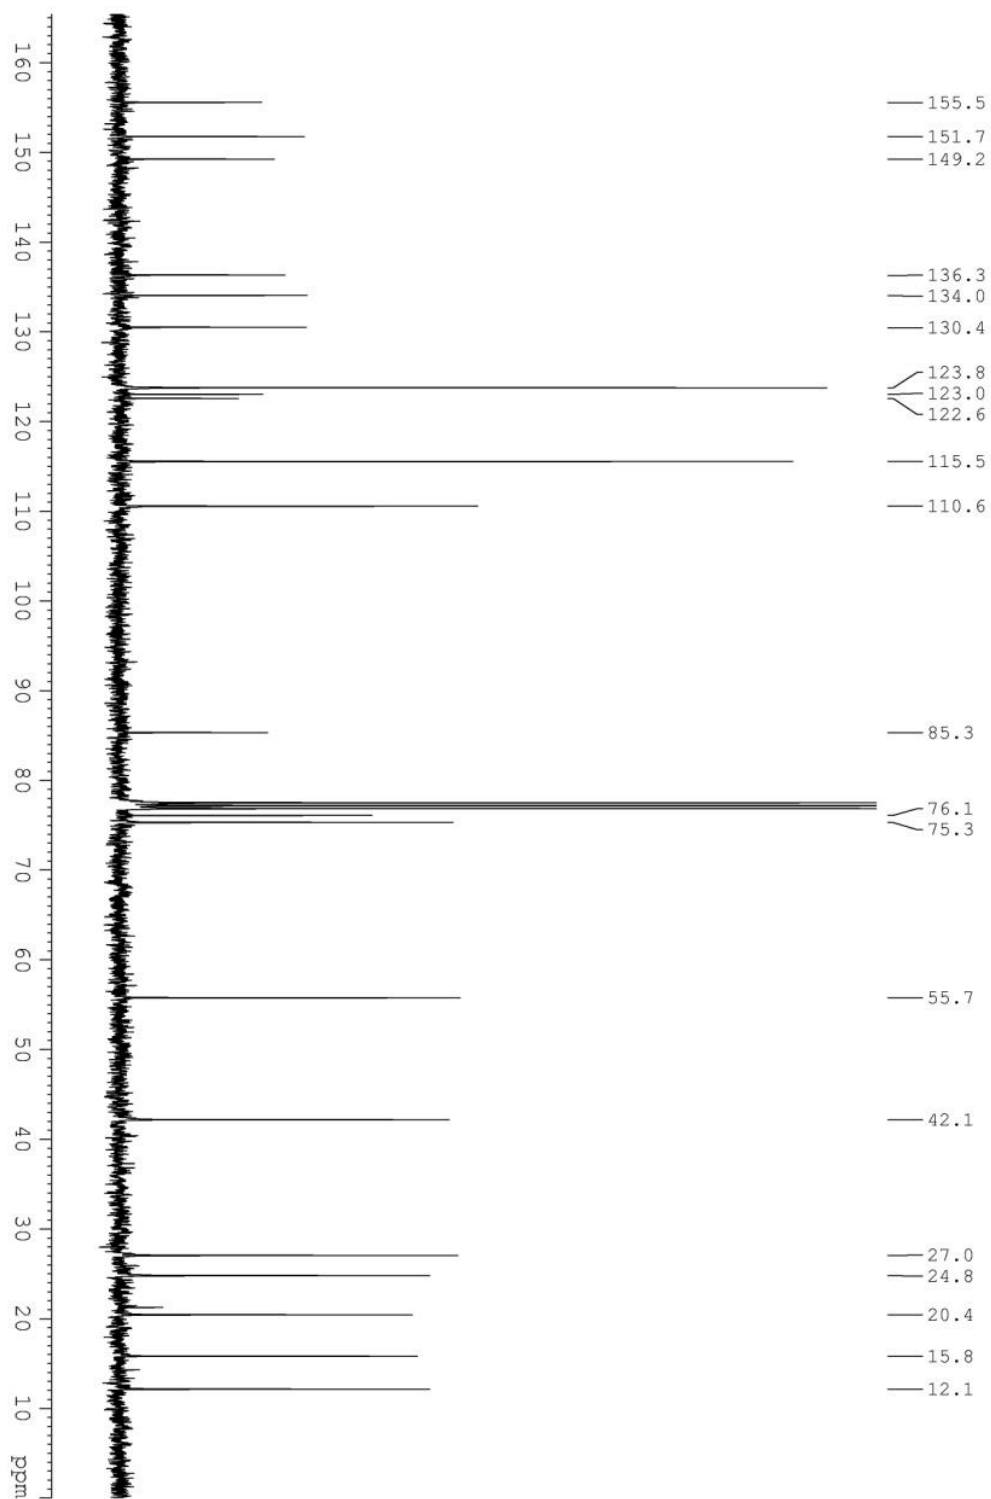

**Figure 24:**  $^{13}\text{C}$  NMR of **20** ( $\text{CDCl}_3$ , 100 MHz).

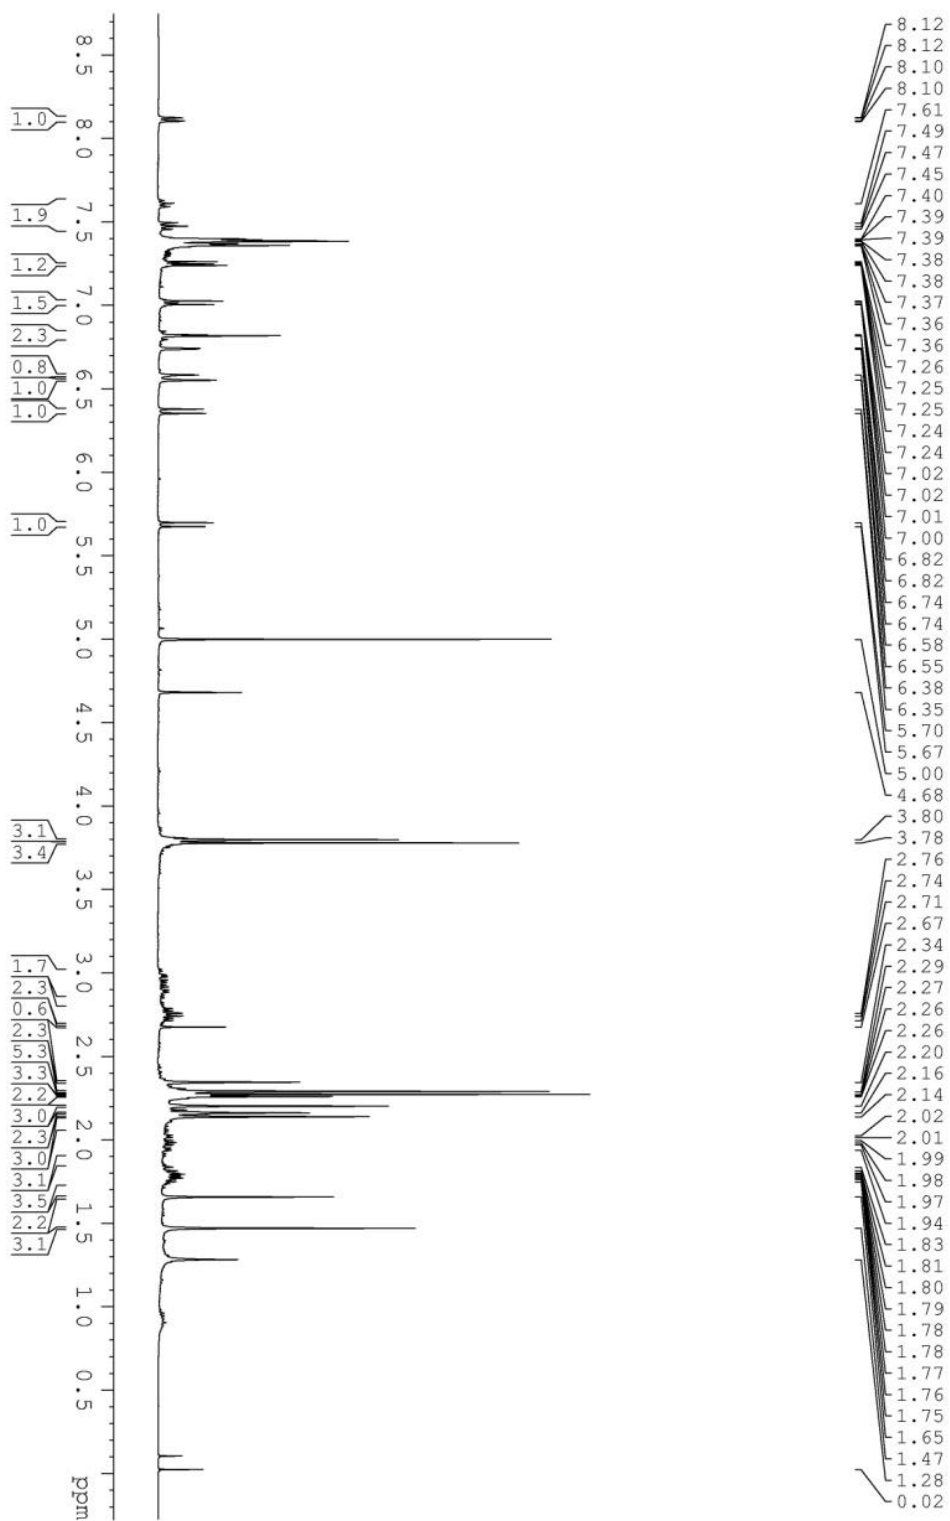

Figure 25:  $^1\text{H}$  NMR of **20** and **21** ( $\text{CDCl}_3$ , 400 MHz).

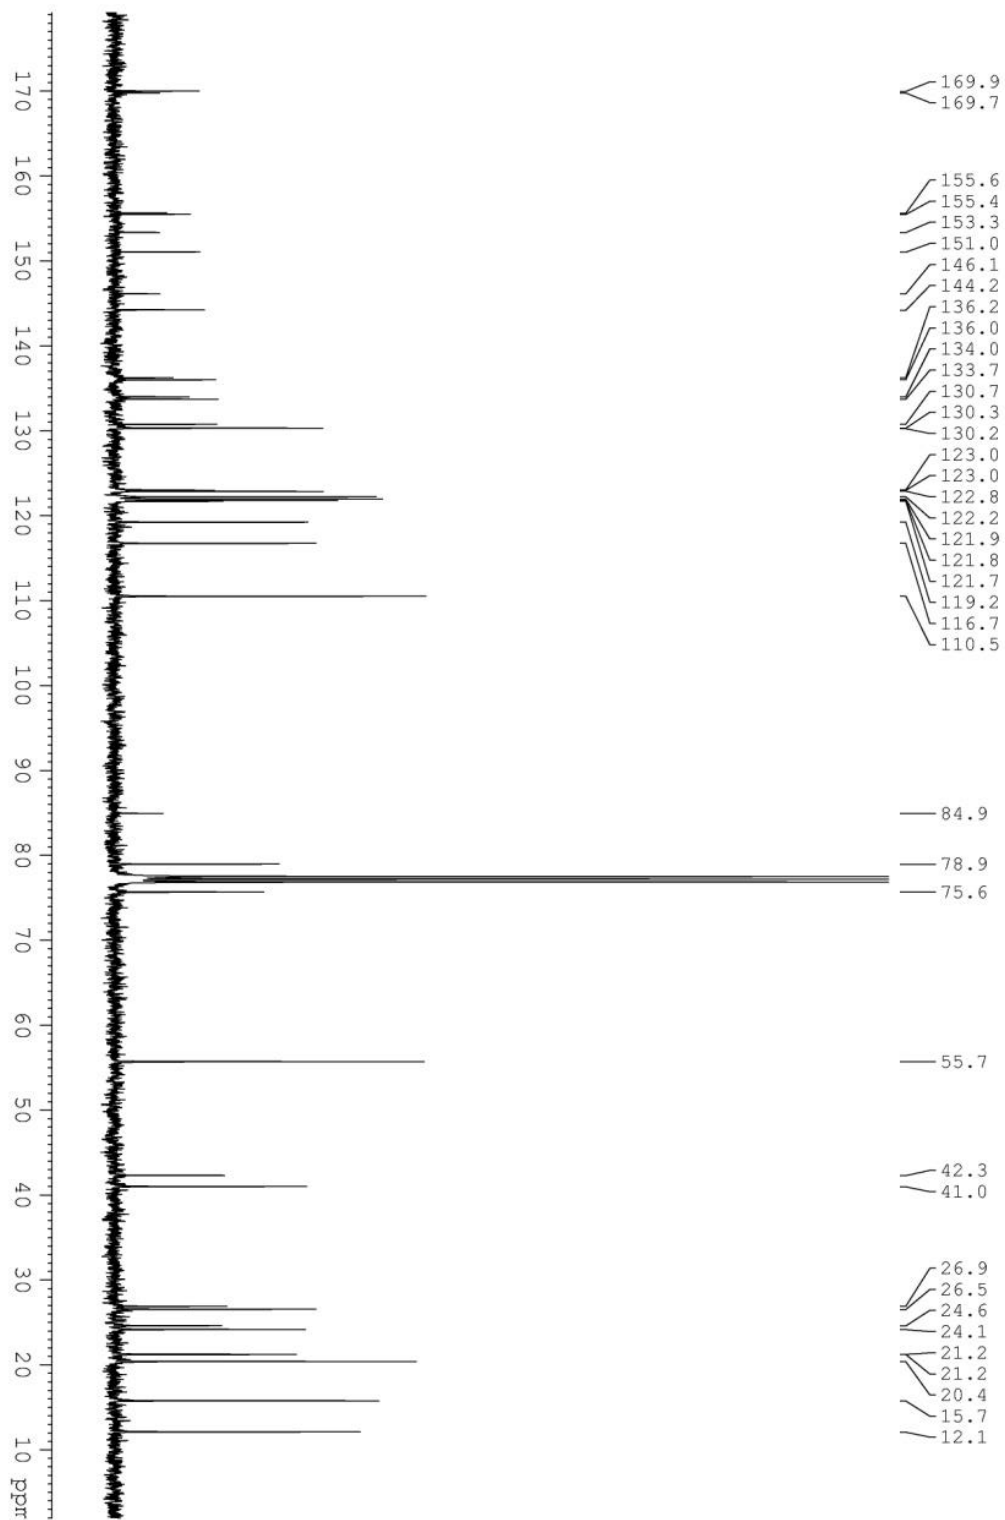

**Figure 26:**  $^{13}\text{C}$  NMR of **20** and **21** ( $\text{CDCl}_3$ , 100 MHz).

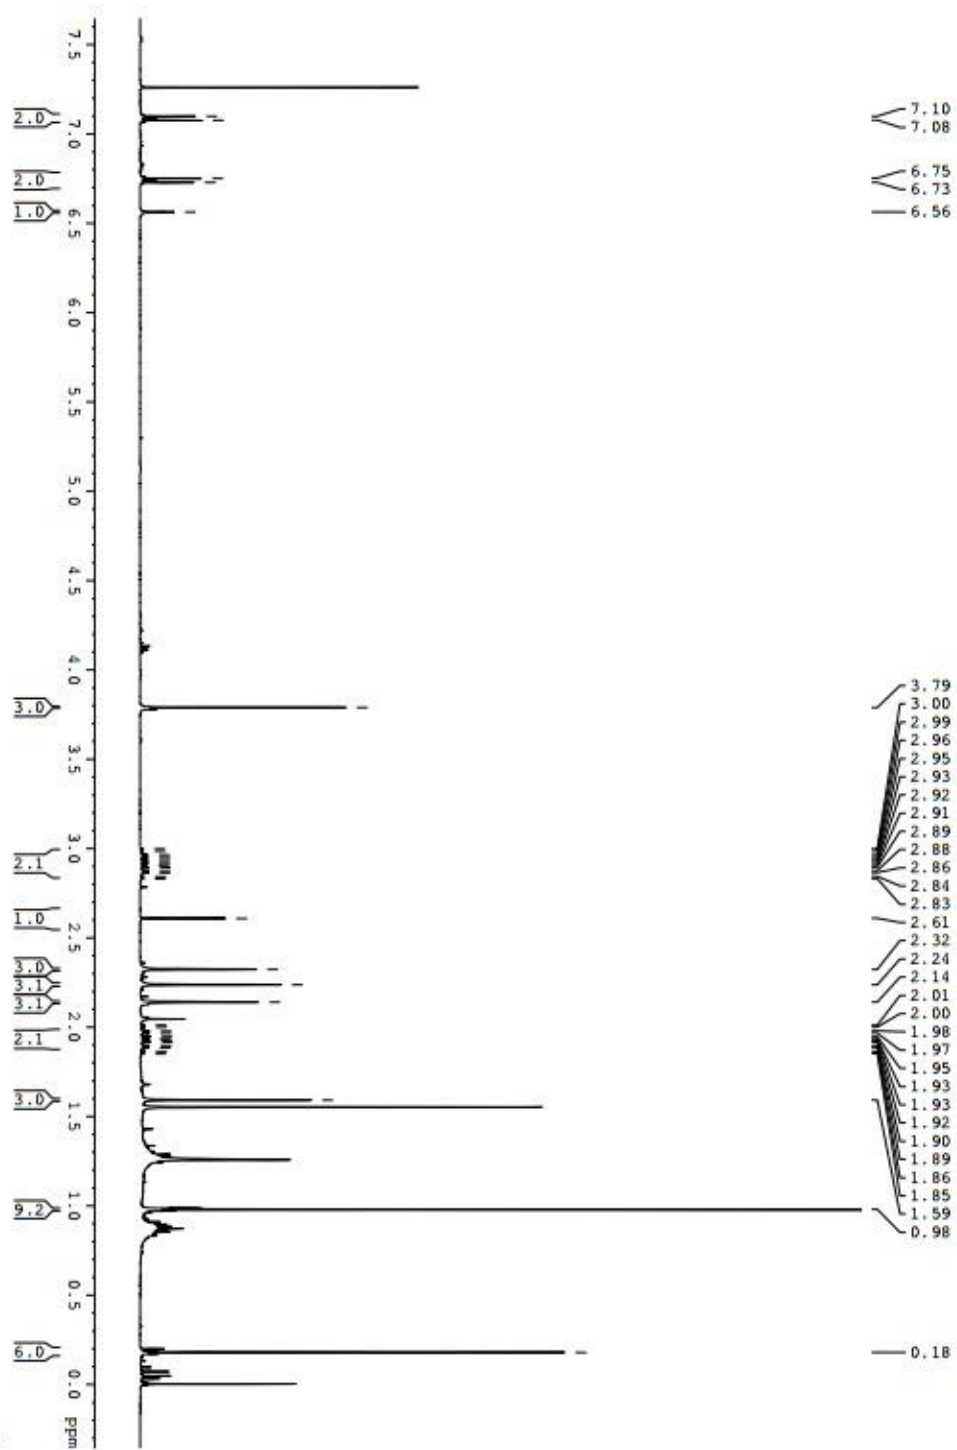

**Figure 27:**  $^1\text{H}$  NMR of **22** ( $\text{CDCl}_3$ , 400 MHz).

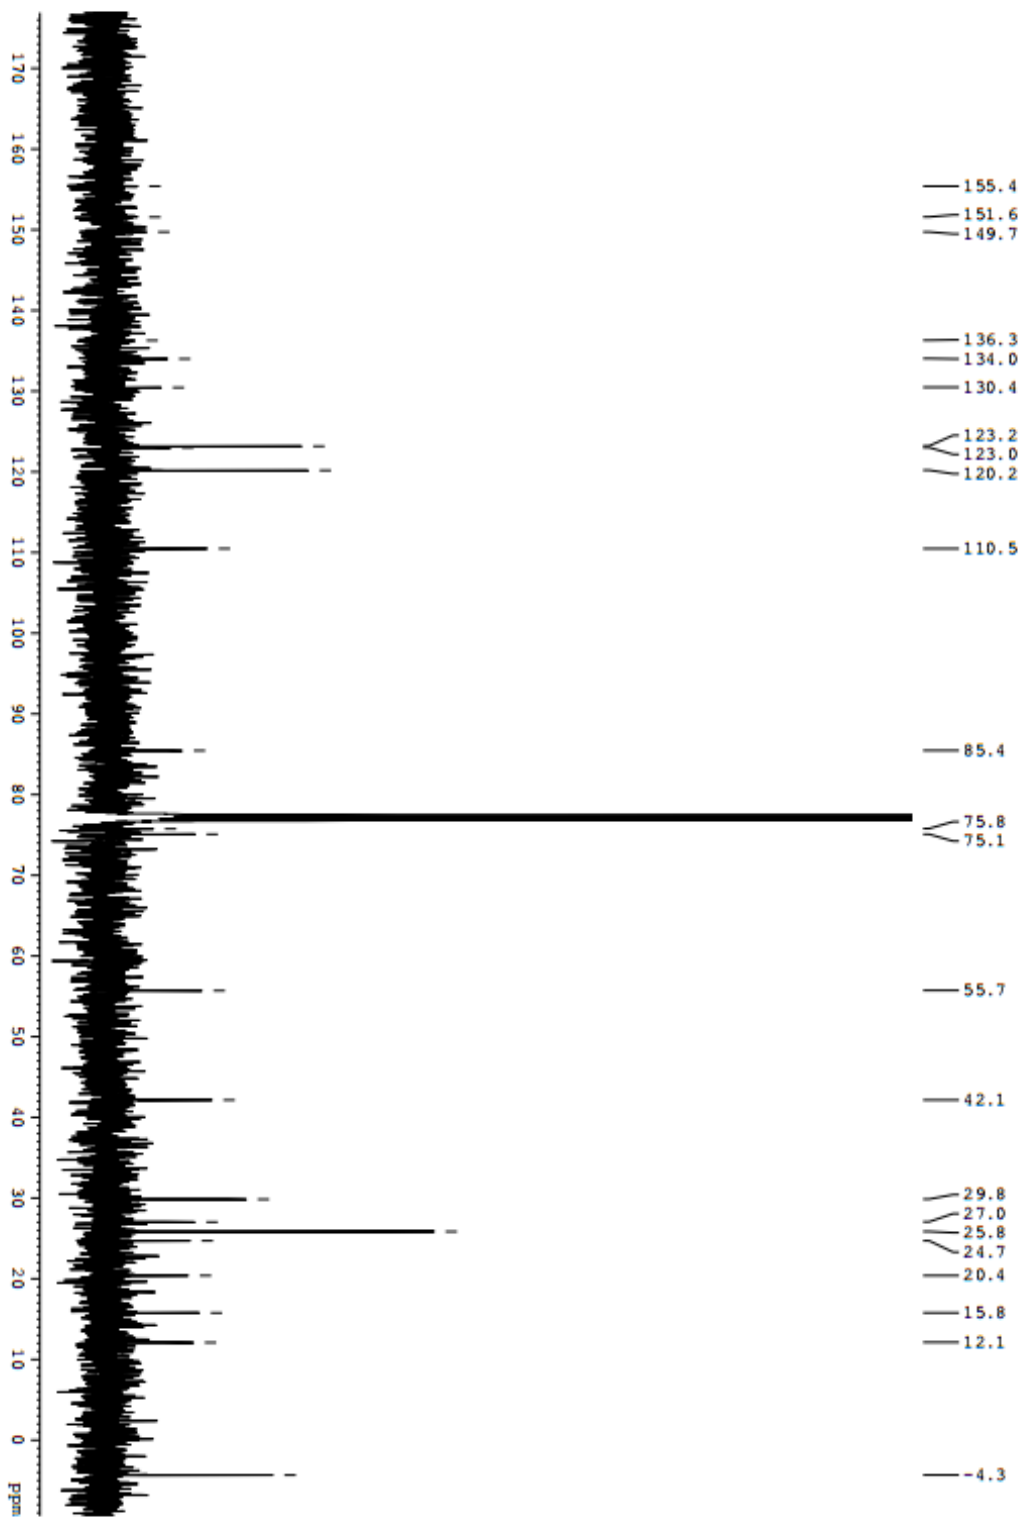

Figure 28:  $^{13}\text{C}$  NMR of **22** ( $\text{CDCl}_3$ , 100 MHz).

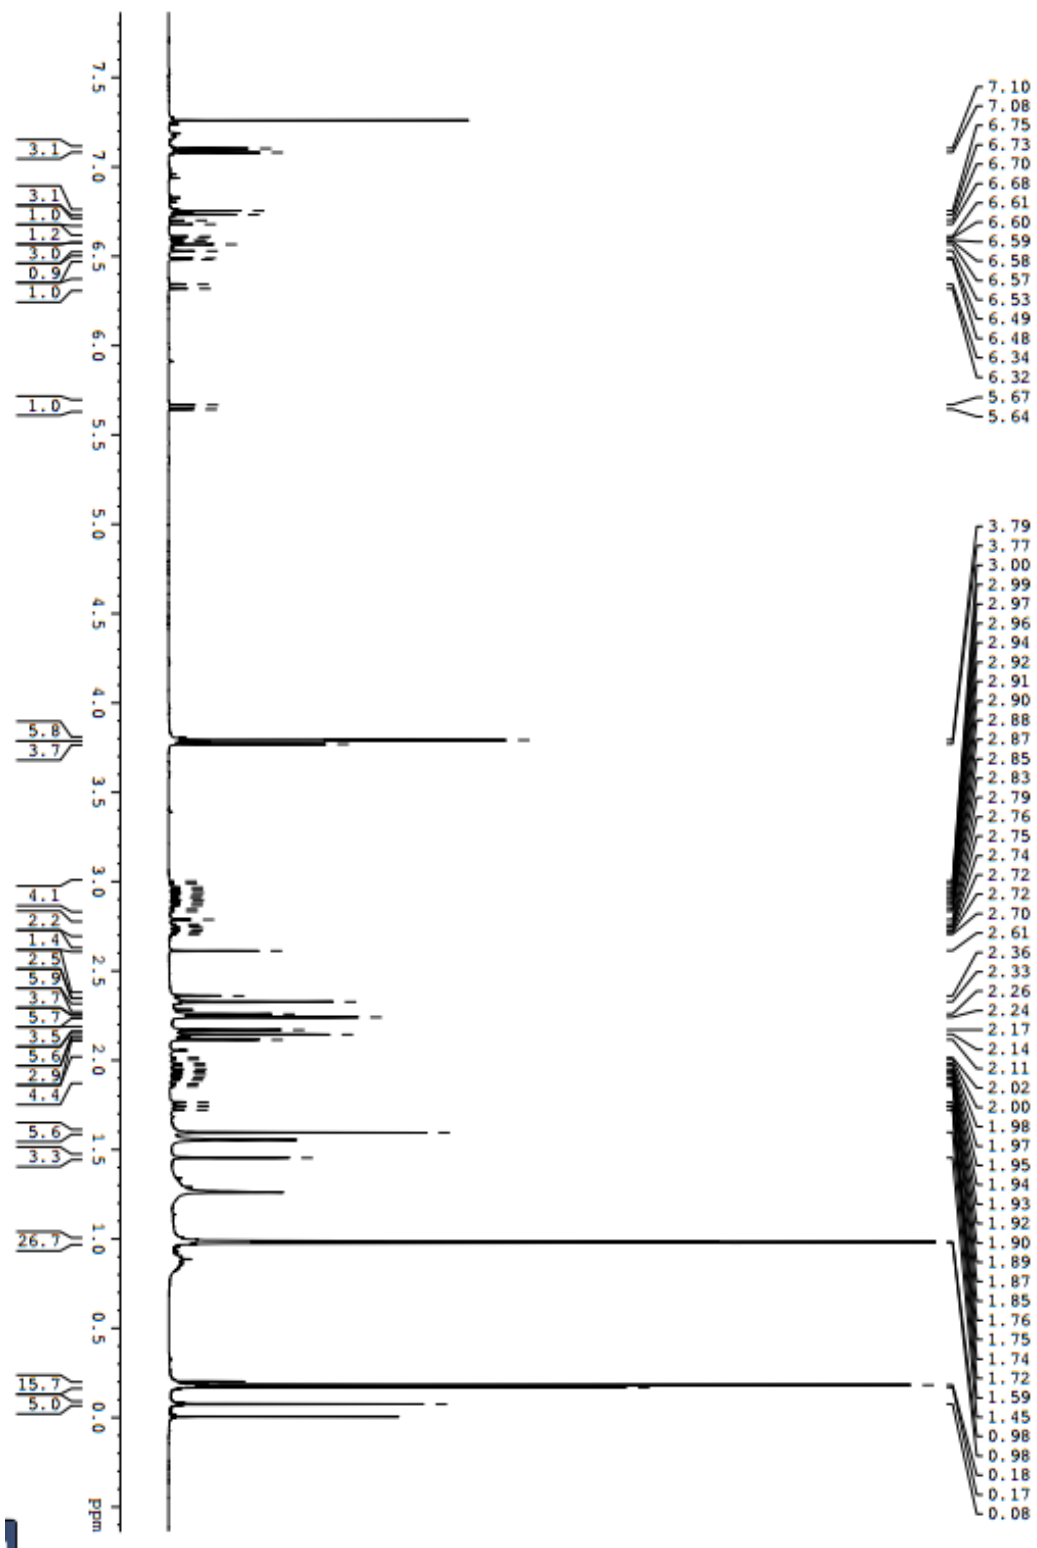

Figure 29:  $^1\text{H}$  NMR of **22** and **23** ( $\text{CDCl}_3$ , 400 MHz).

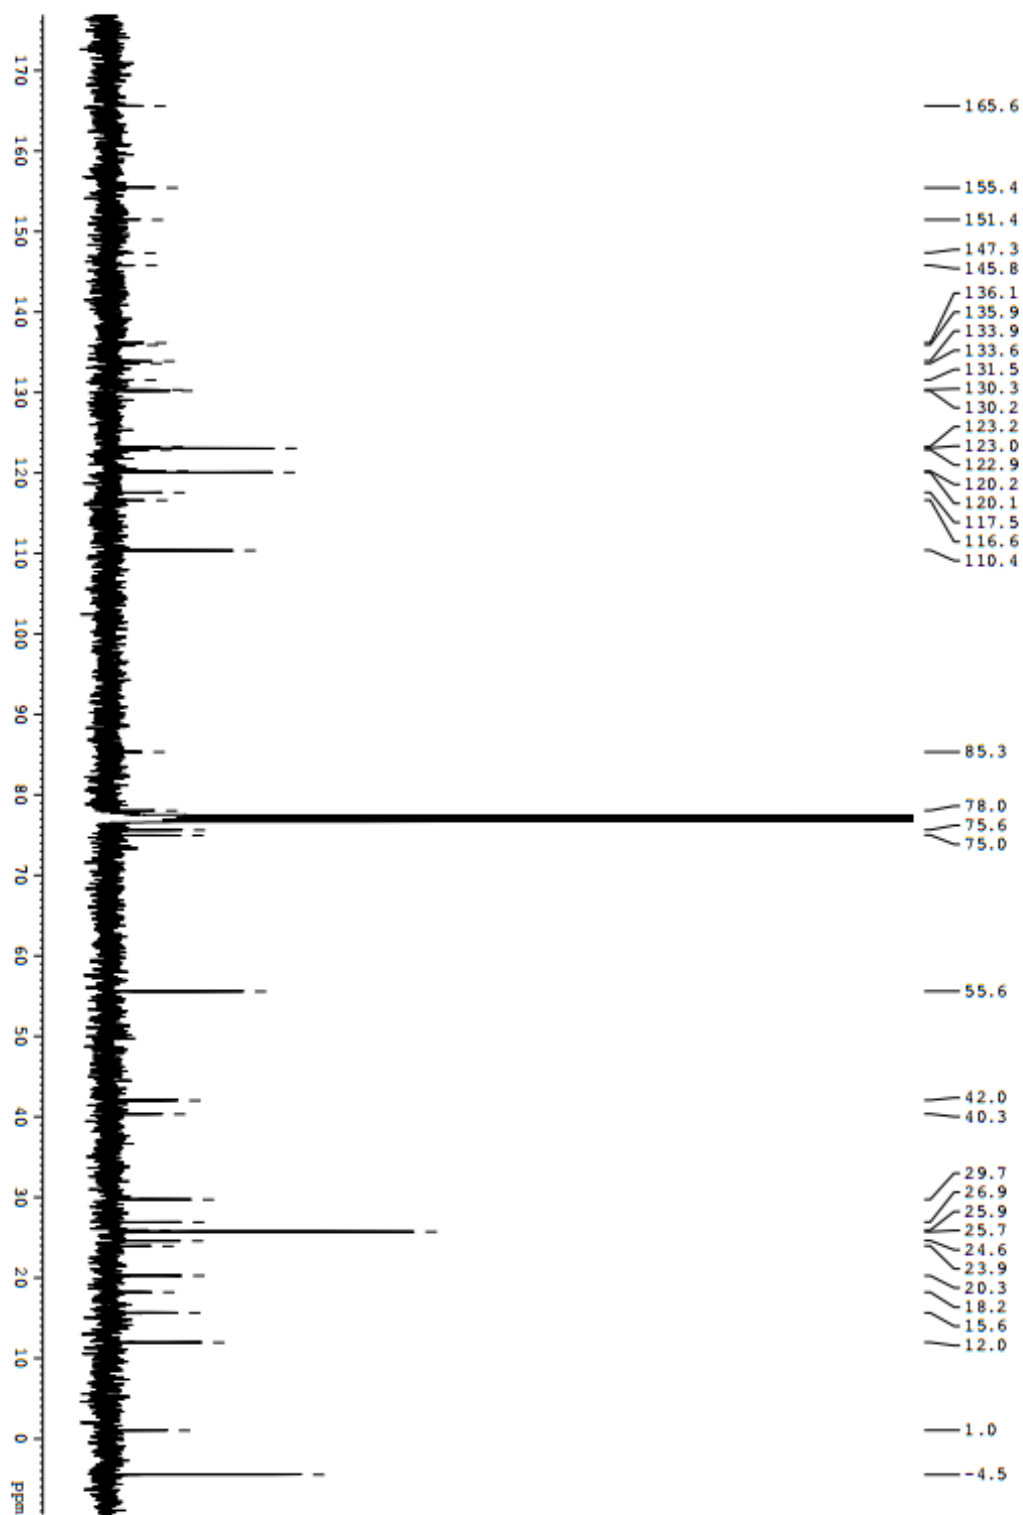

Figure 30:  $^{13}\text{C}$  NMR of **22** and **23** ( $\text{CDCl}_3$ , 100 MHz).



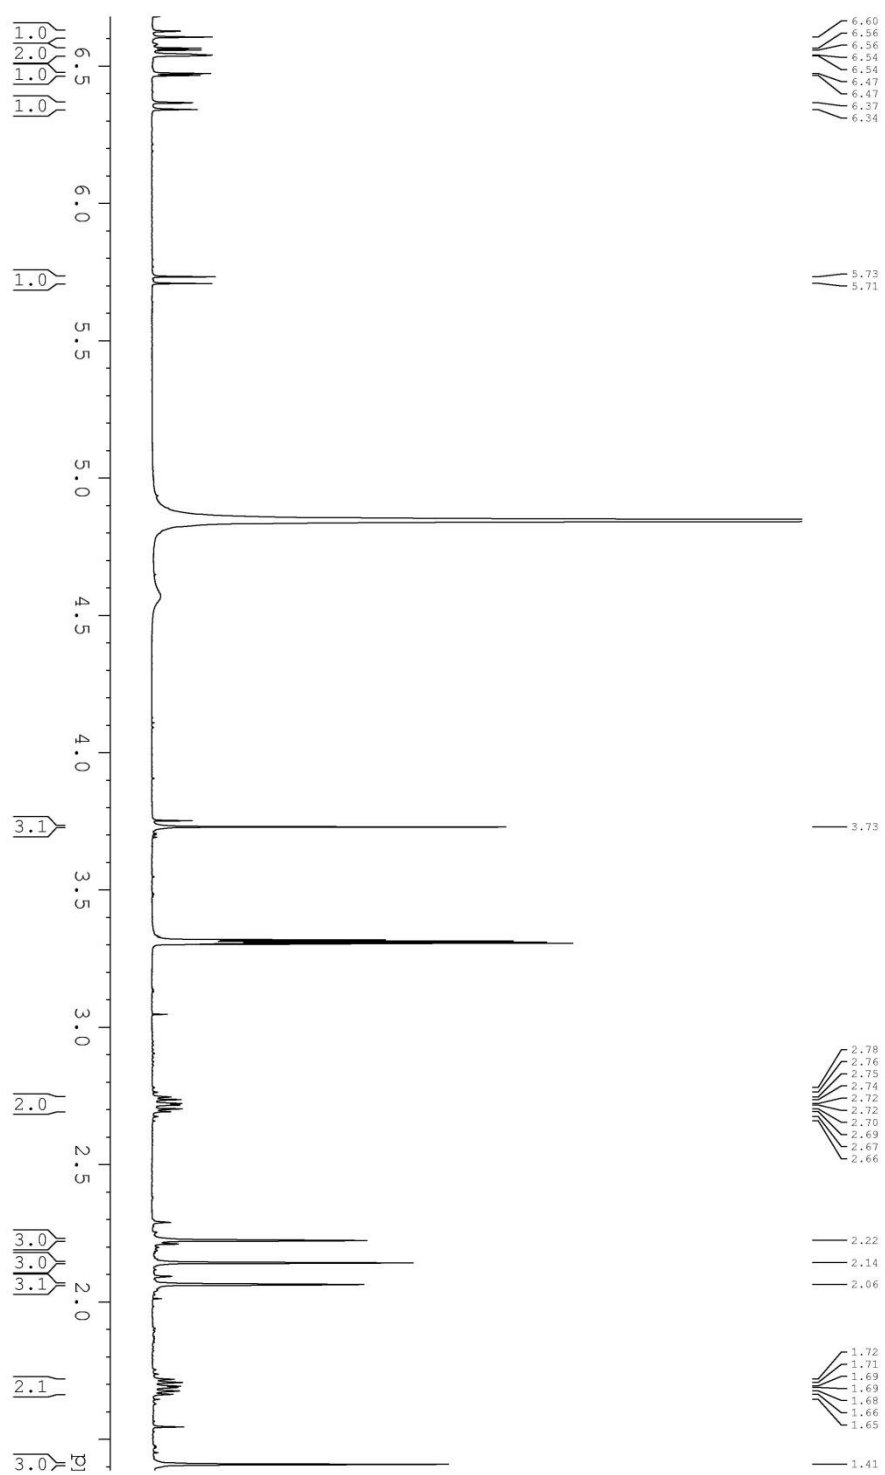

**Figure 31:**  $^1\text{H}$  NMR of 5 ( $\text{CD}_3\text{OD}$ , 500 MHz).

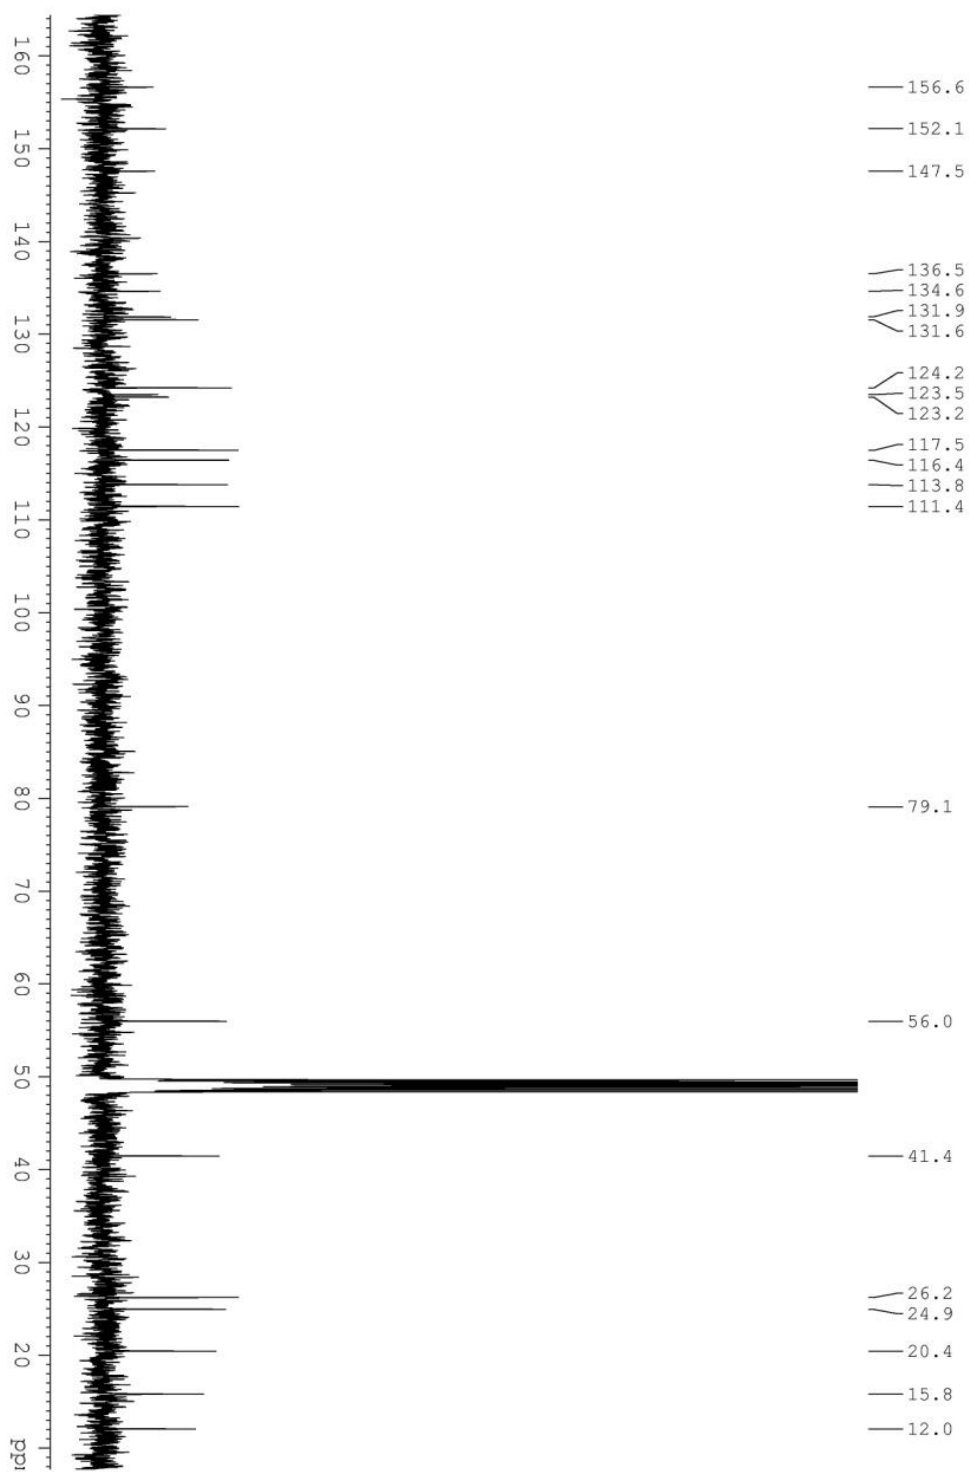

**Figure 32:**  $^{13}\text{C}$  NMR of **5** ( $\text{CD}_3\text{OD}$ , 125 MHz).
